# Supplementary material for: Using phage display for rational engineering of a higher affinity humanized 3’ phosphohistidine-specific antibody
Source: PubMed Central journal article supplement — bioRxiv. 2024 Nov 4:2024.11.04.621849. Preprint. [Version 1] doi: 10.1101/2024.11.04.621849 (PMC11580931; doi:10.1101/2024.11.04.621849), 2024-11-04
Supplement: media-1.pdf [file media-1.pdf]

Fig. S1.

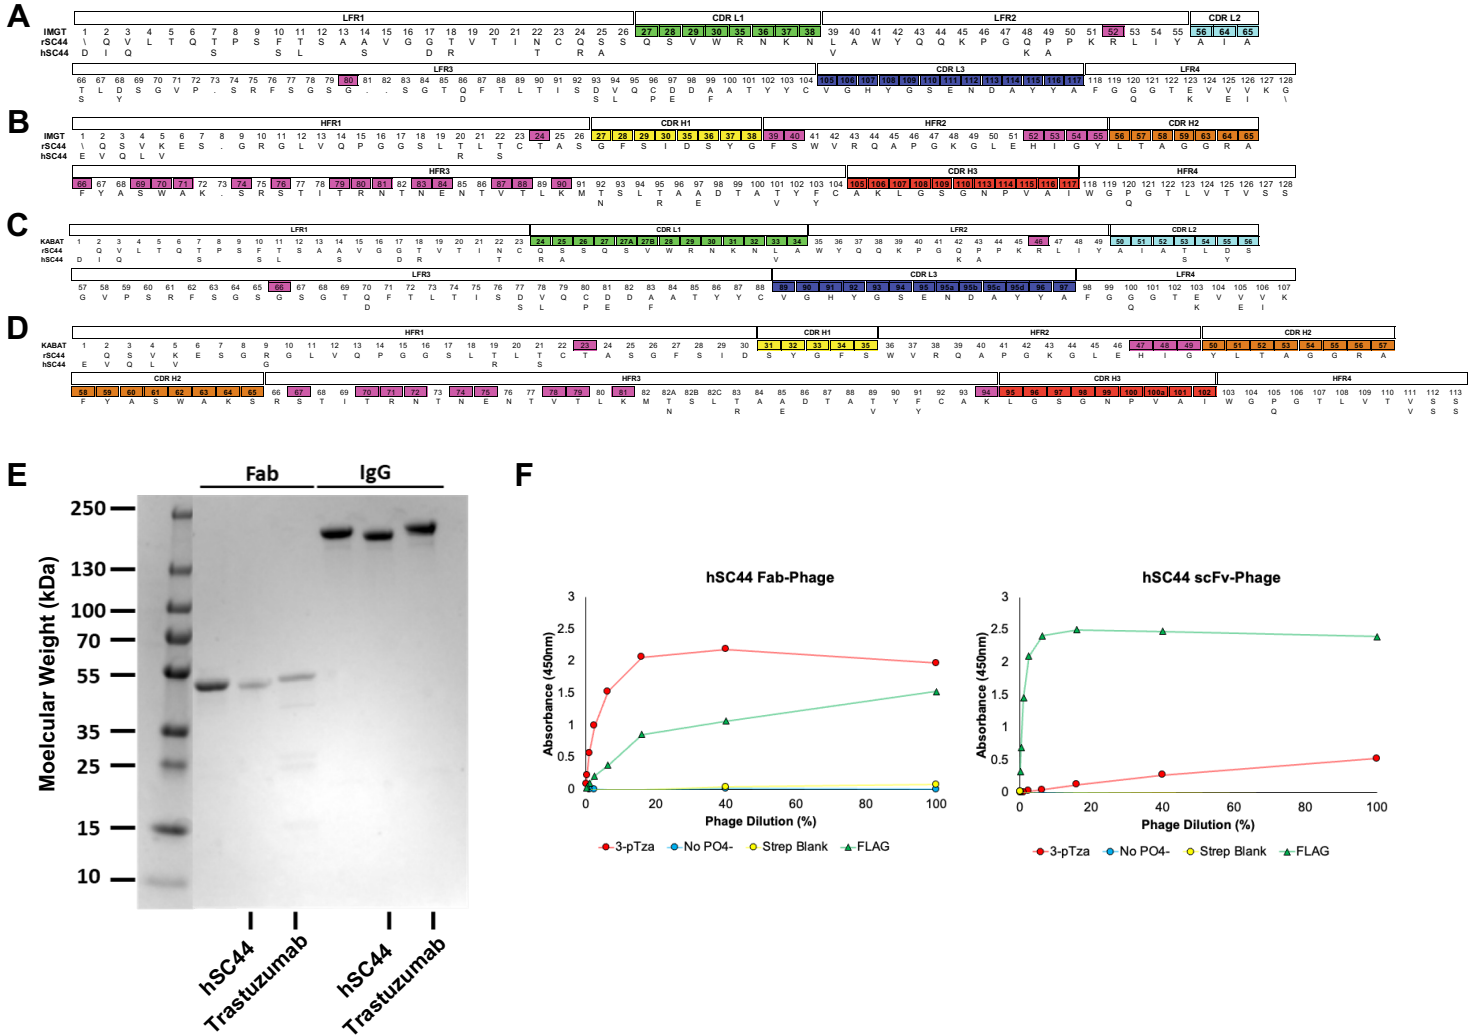

**Fig. S2.**

### 1. Phosphoramidate Reaction

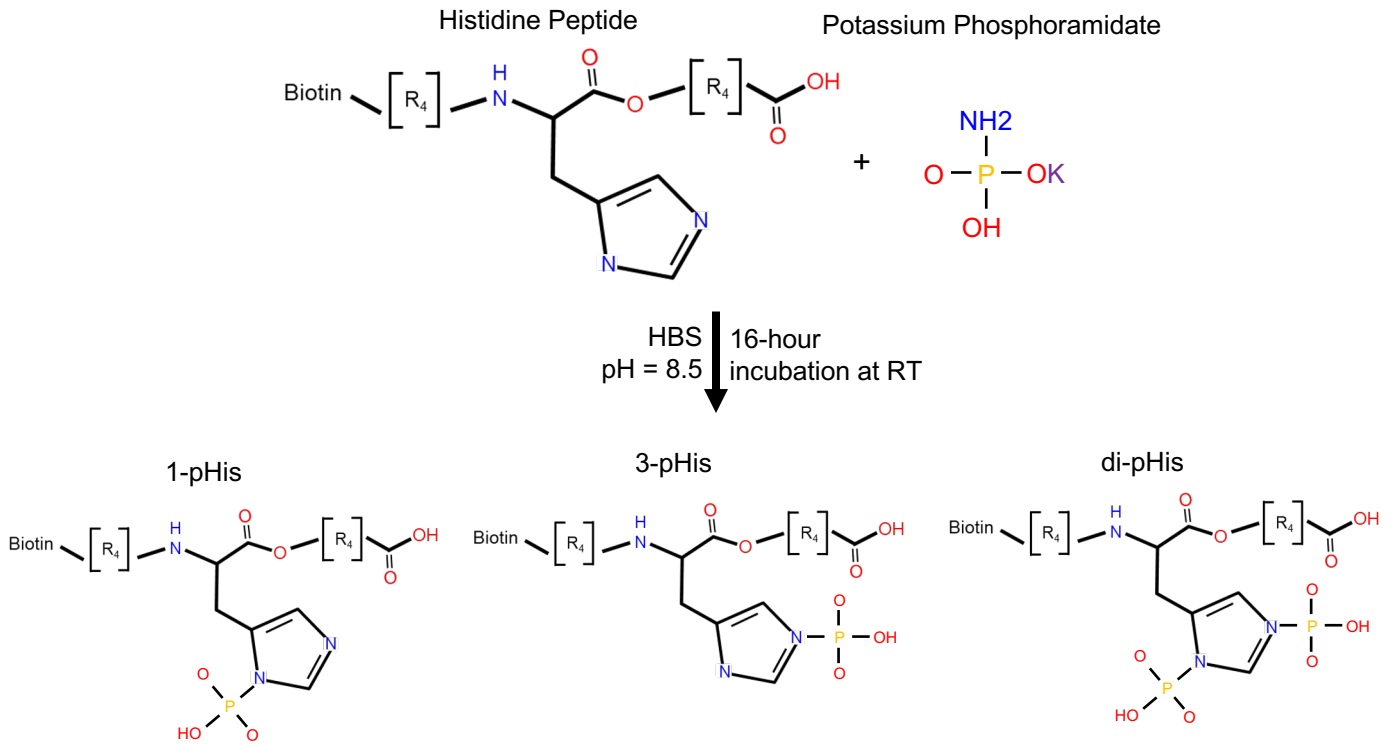

### 2. Phosphohistidine Immunoprecipitation

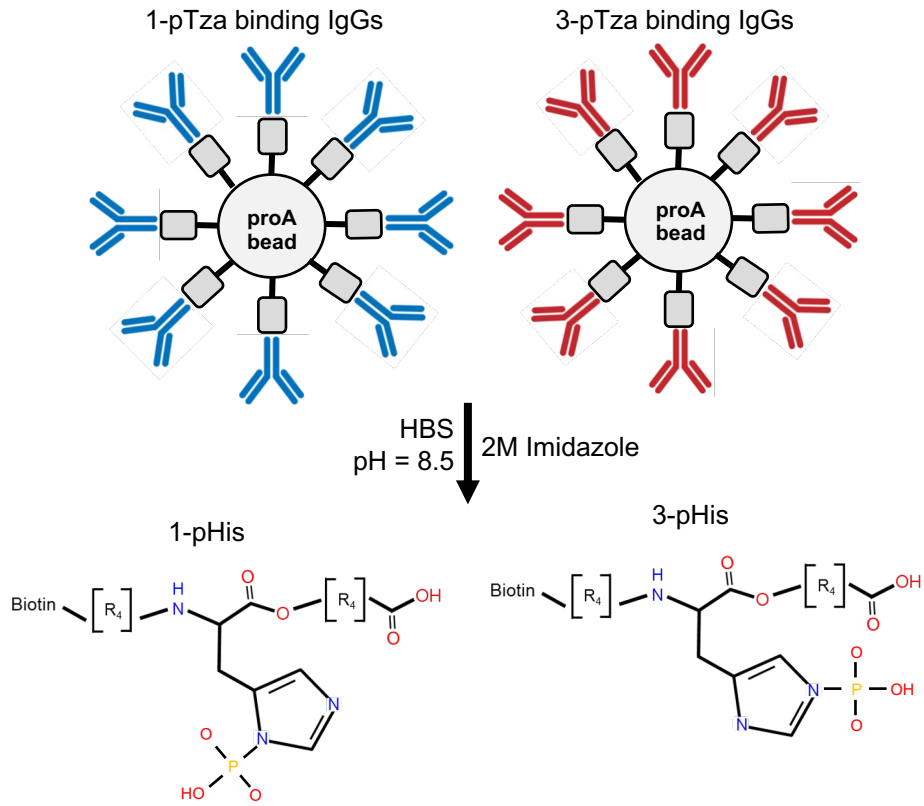

**Fig. S3.**

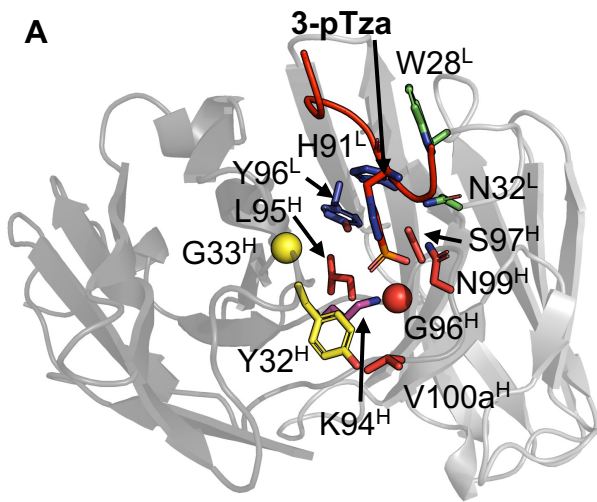

Library 1 Size:  $2 \times 10^9$

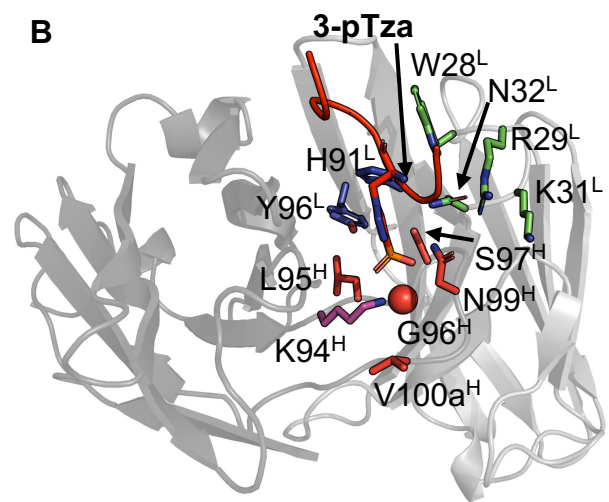

Library 2 Size:  $2 \times 10^9$

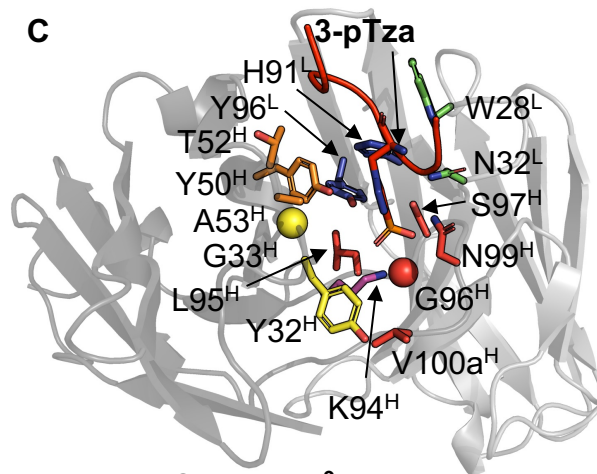

Library 3 Size:  $4 \times 10^9$

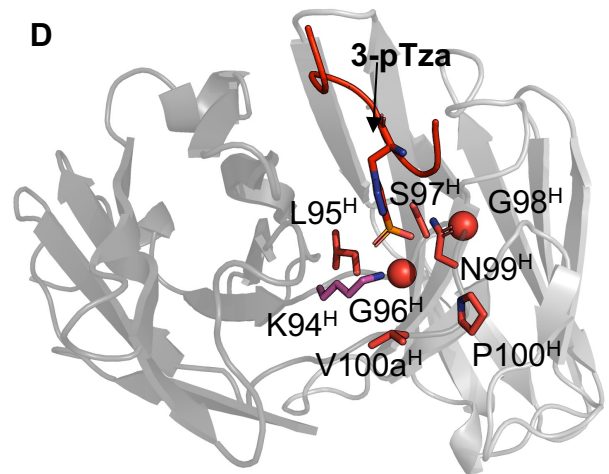

Library 4 Size:  $2 \times 10^{10}$

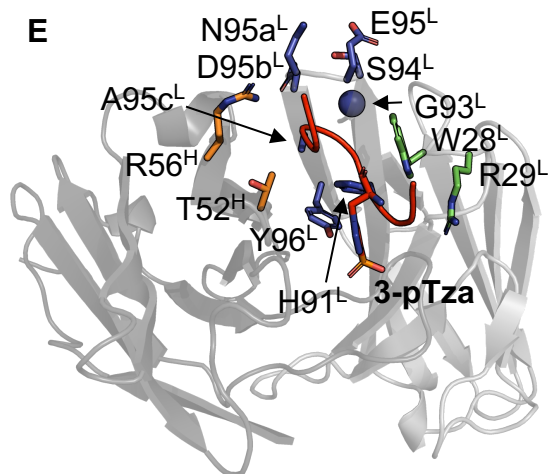

Library 5 Size:  $2 \times 10^9$

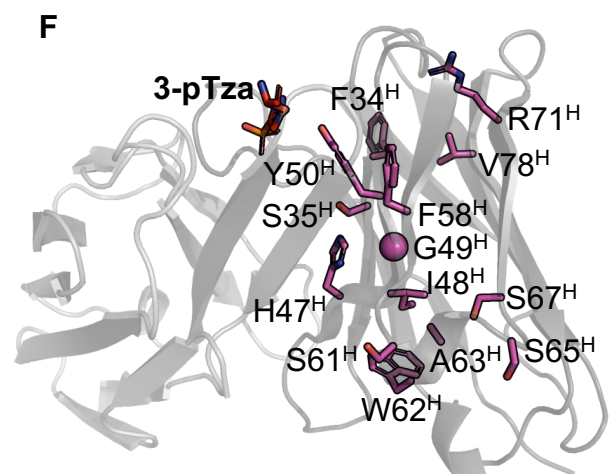

Library 6 Size:  $3 \times 10^9$



**Fig. S5.**

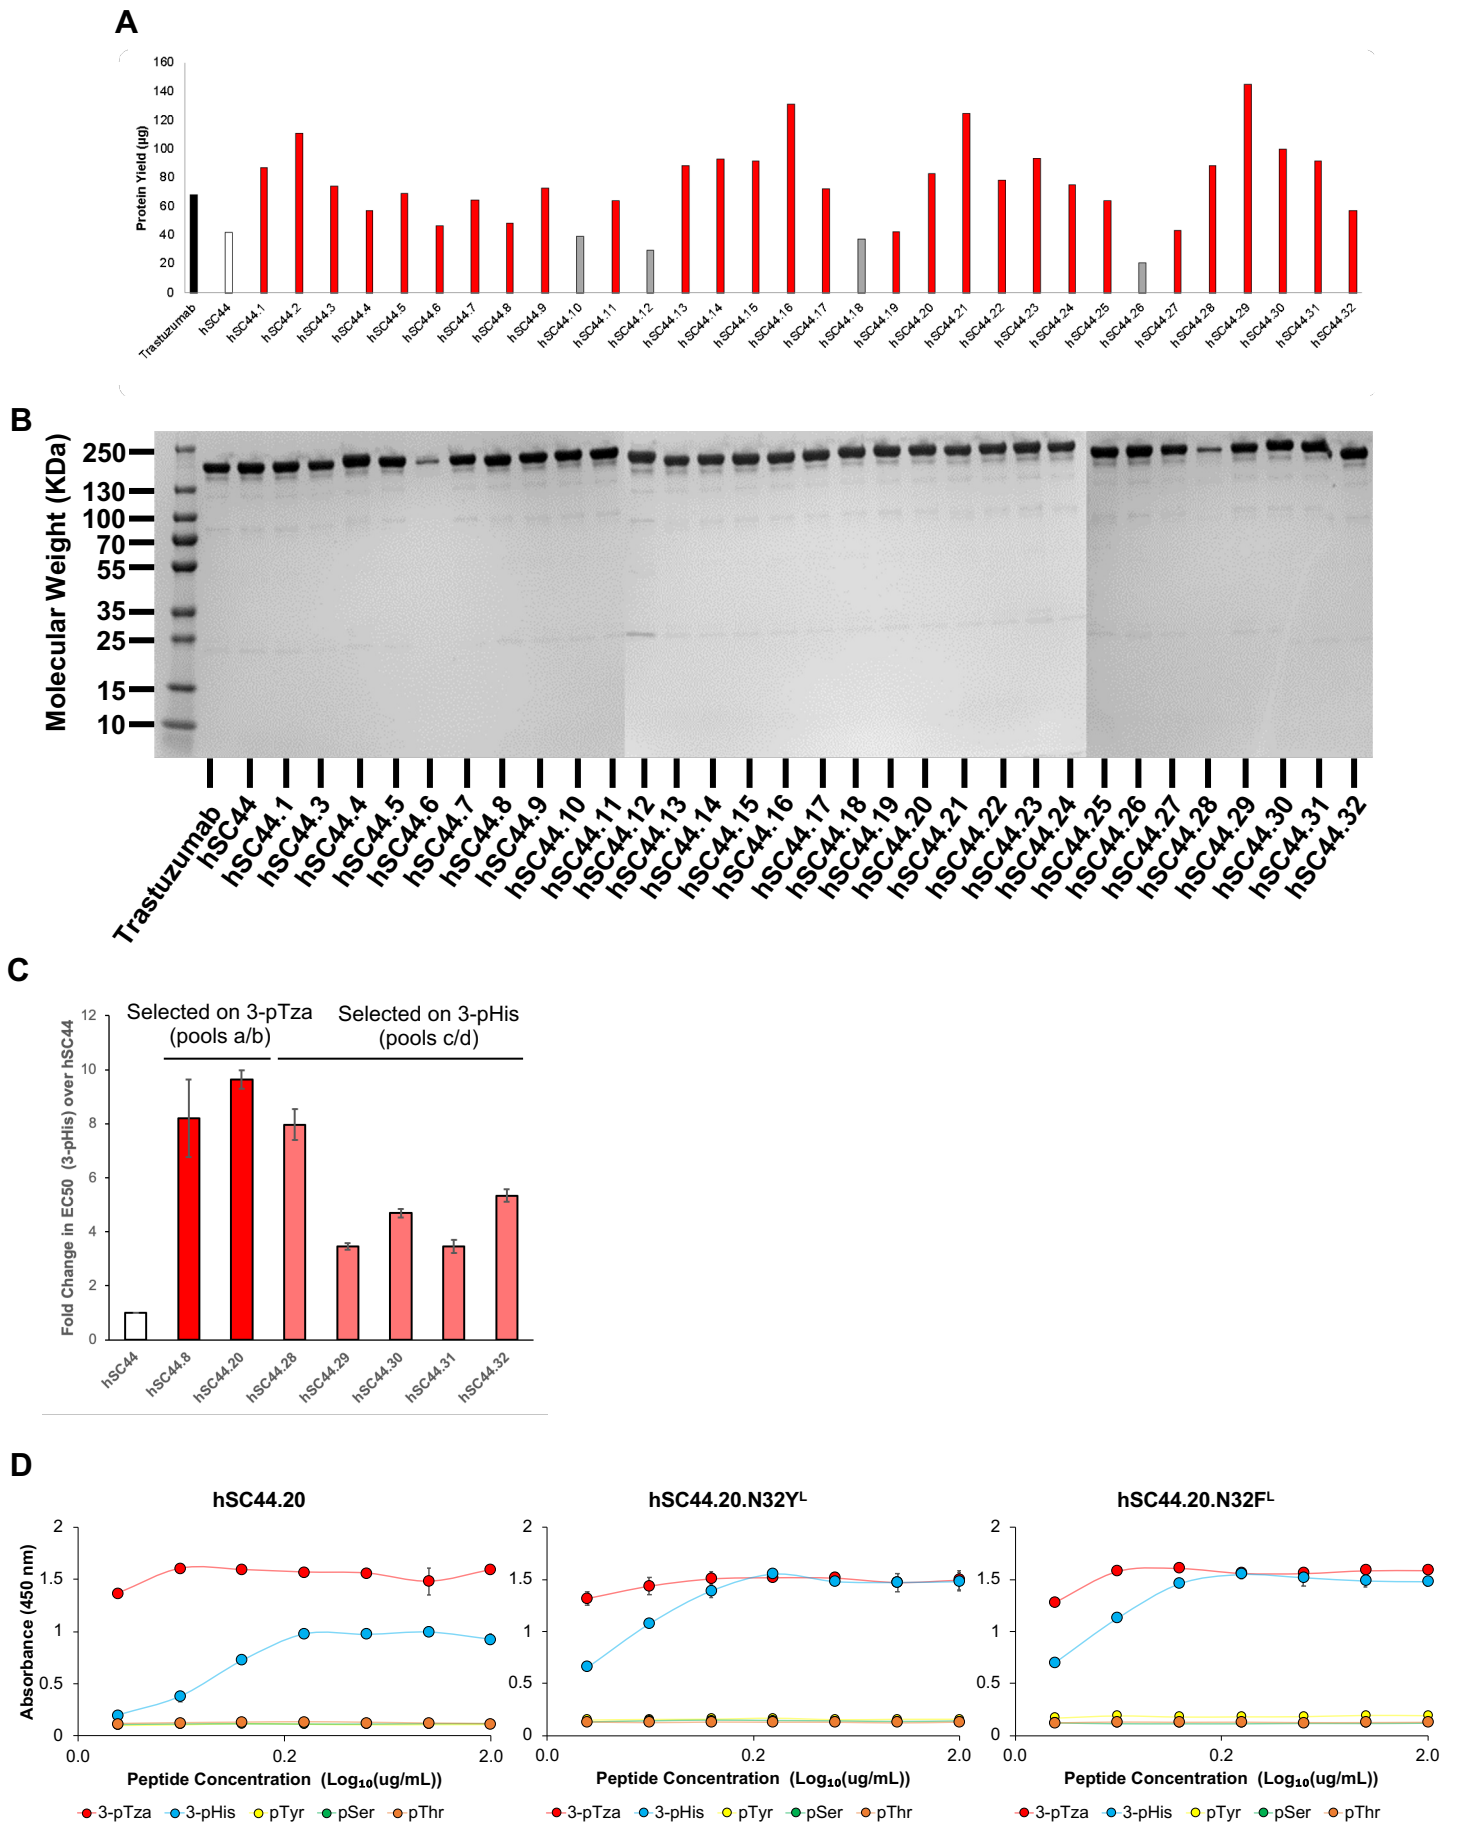

**Fig. S6.**

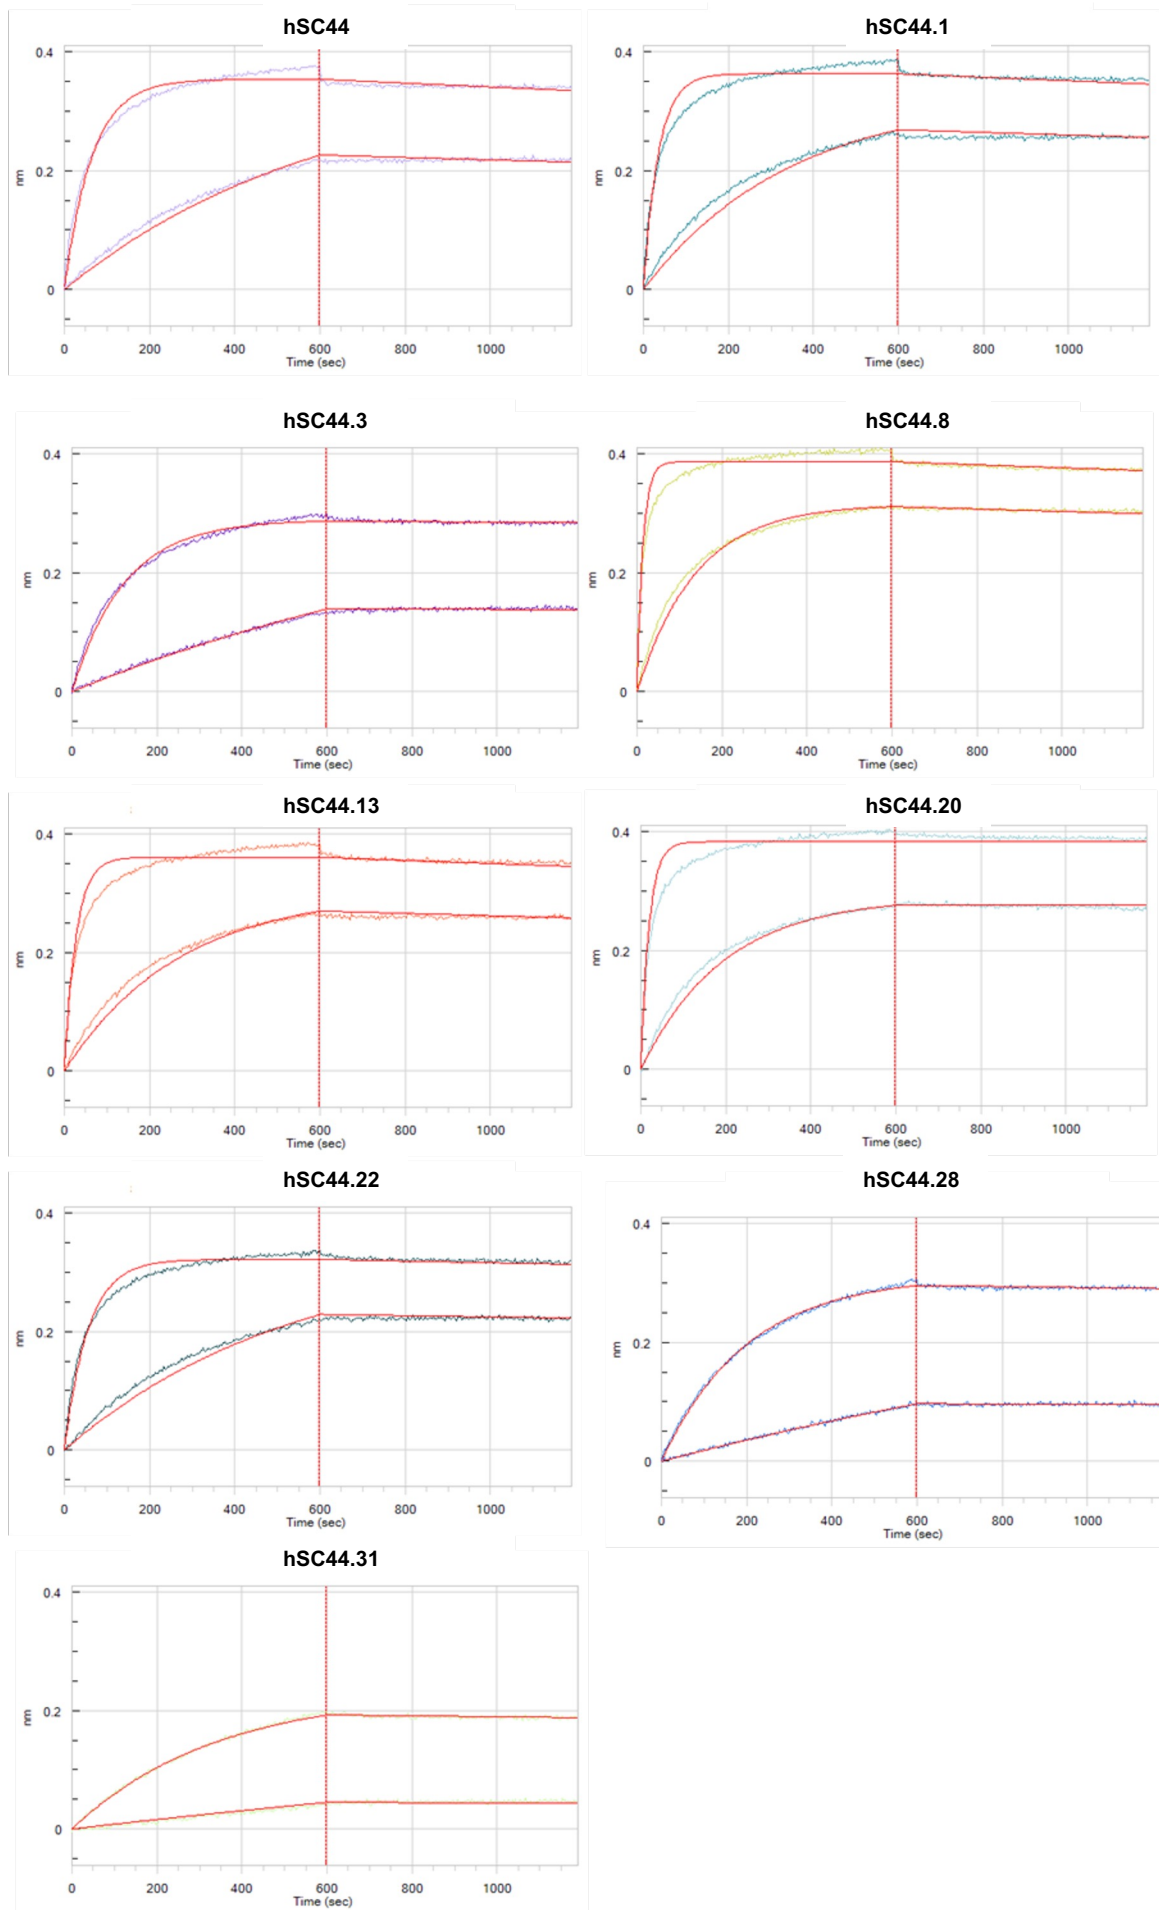

Fig. S7.

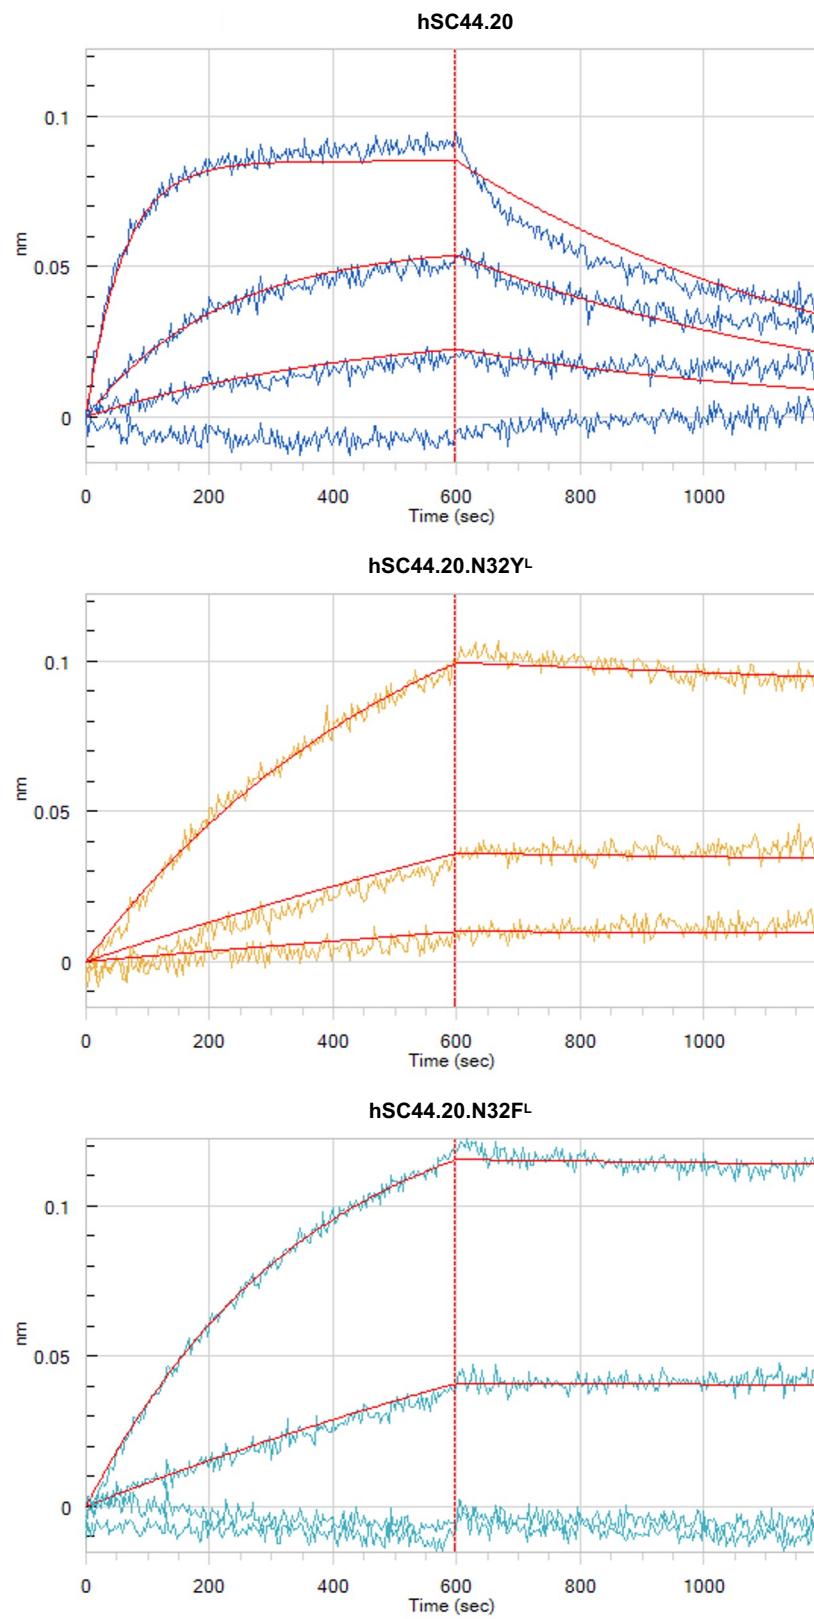

Fig. S8.

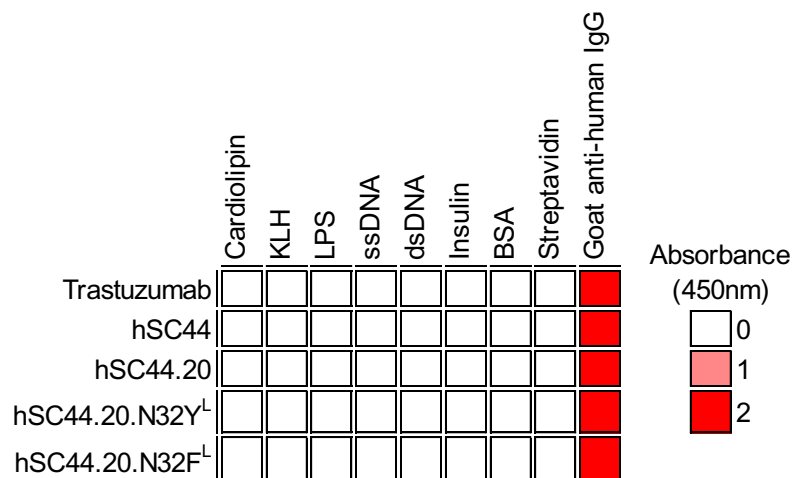



Fig. S9.

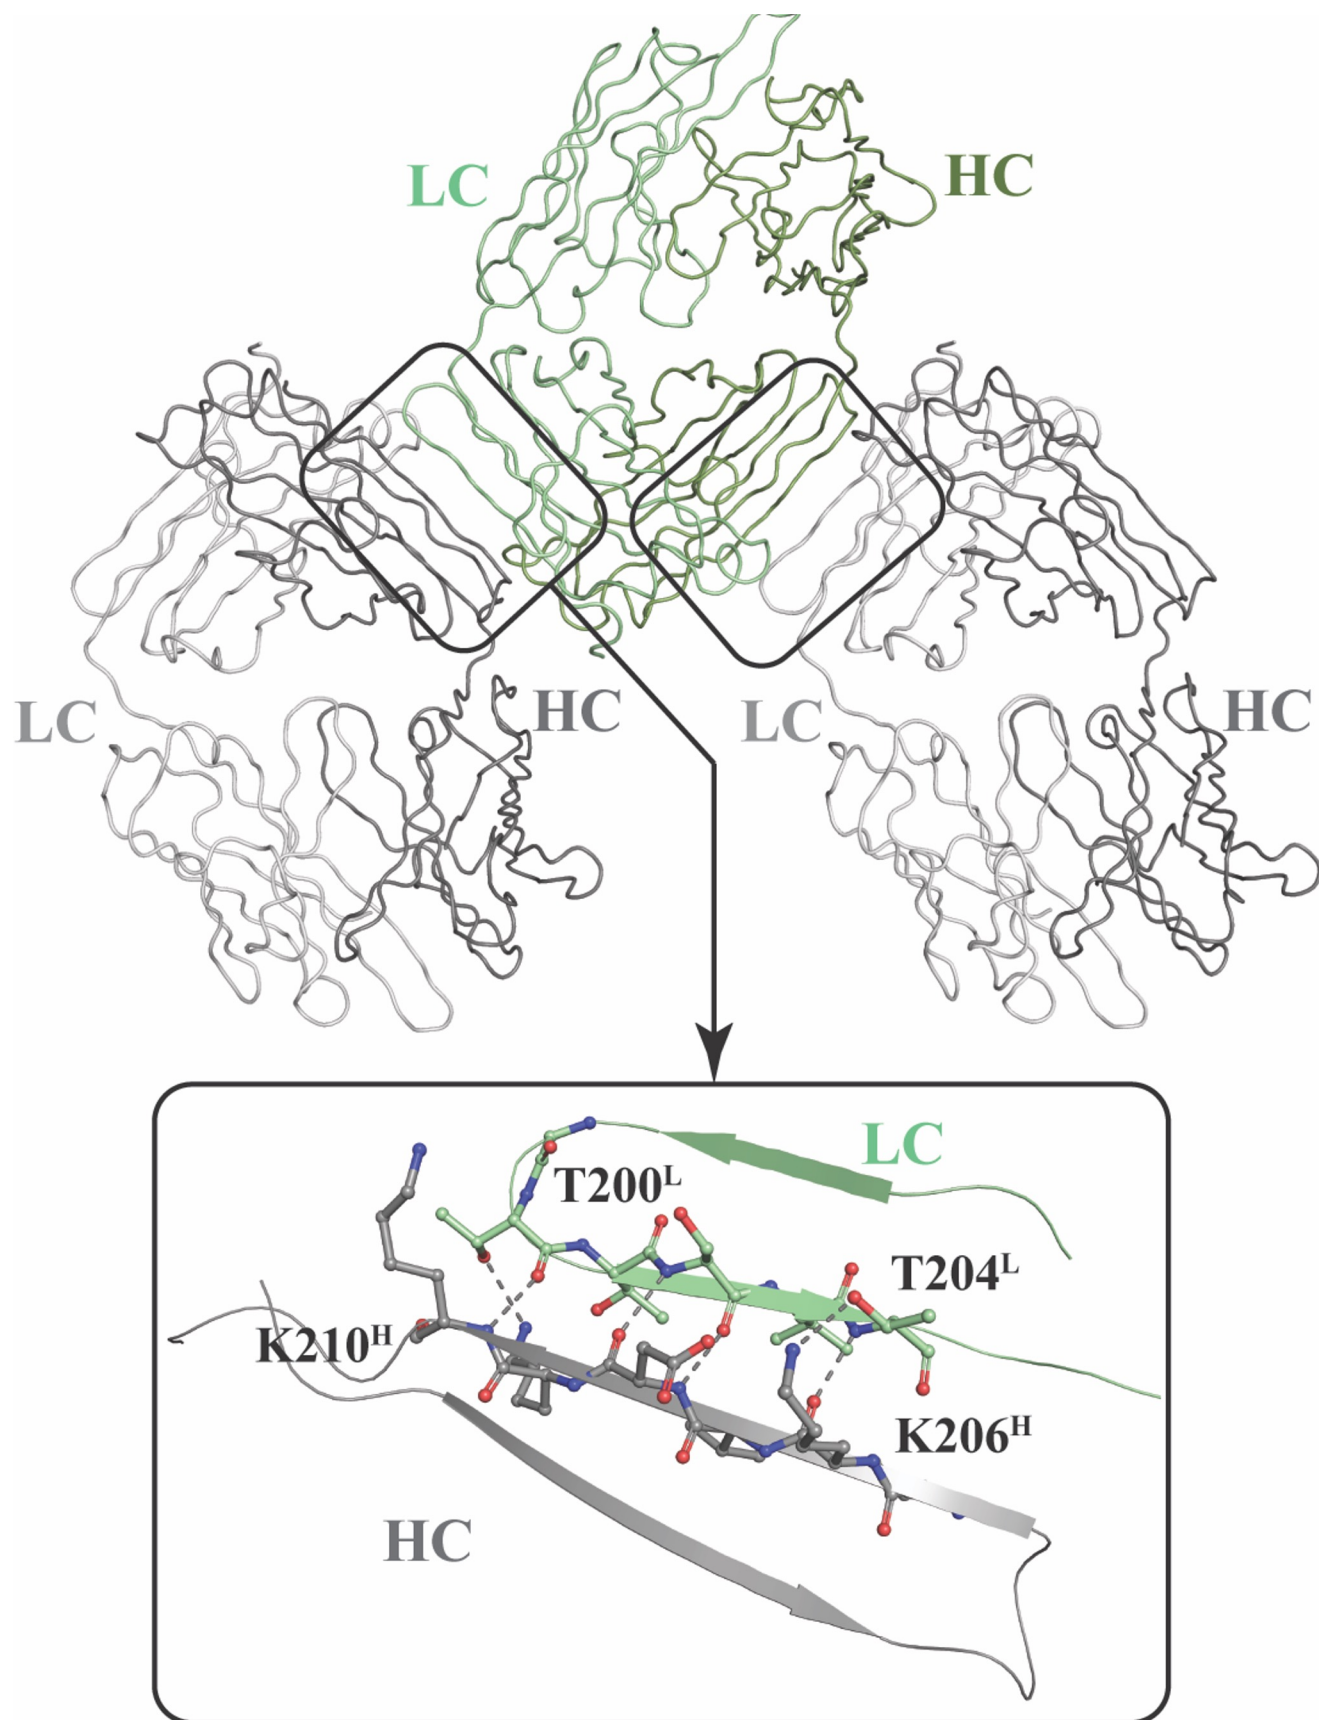

Fig. S10.

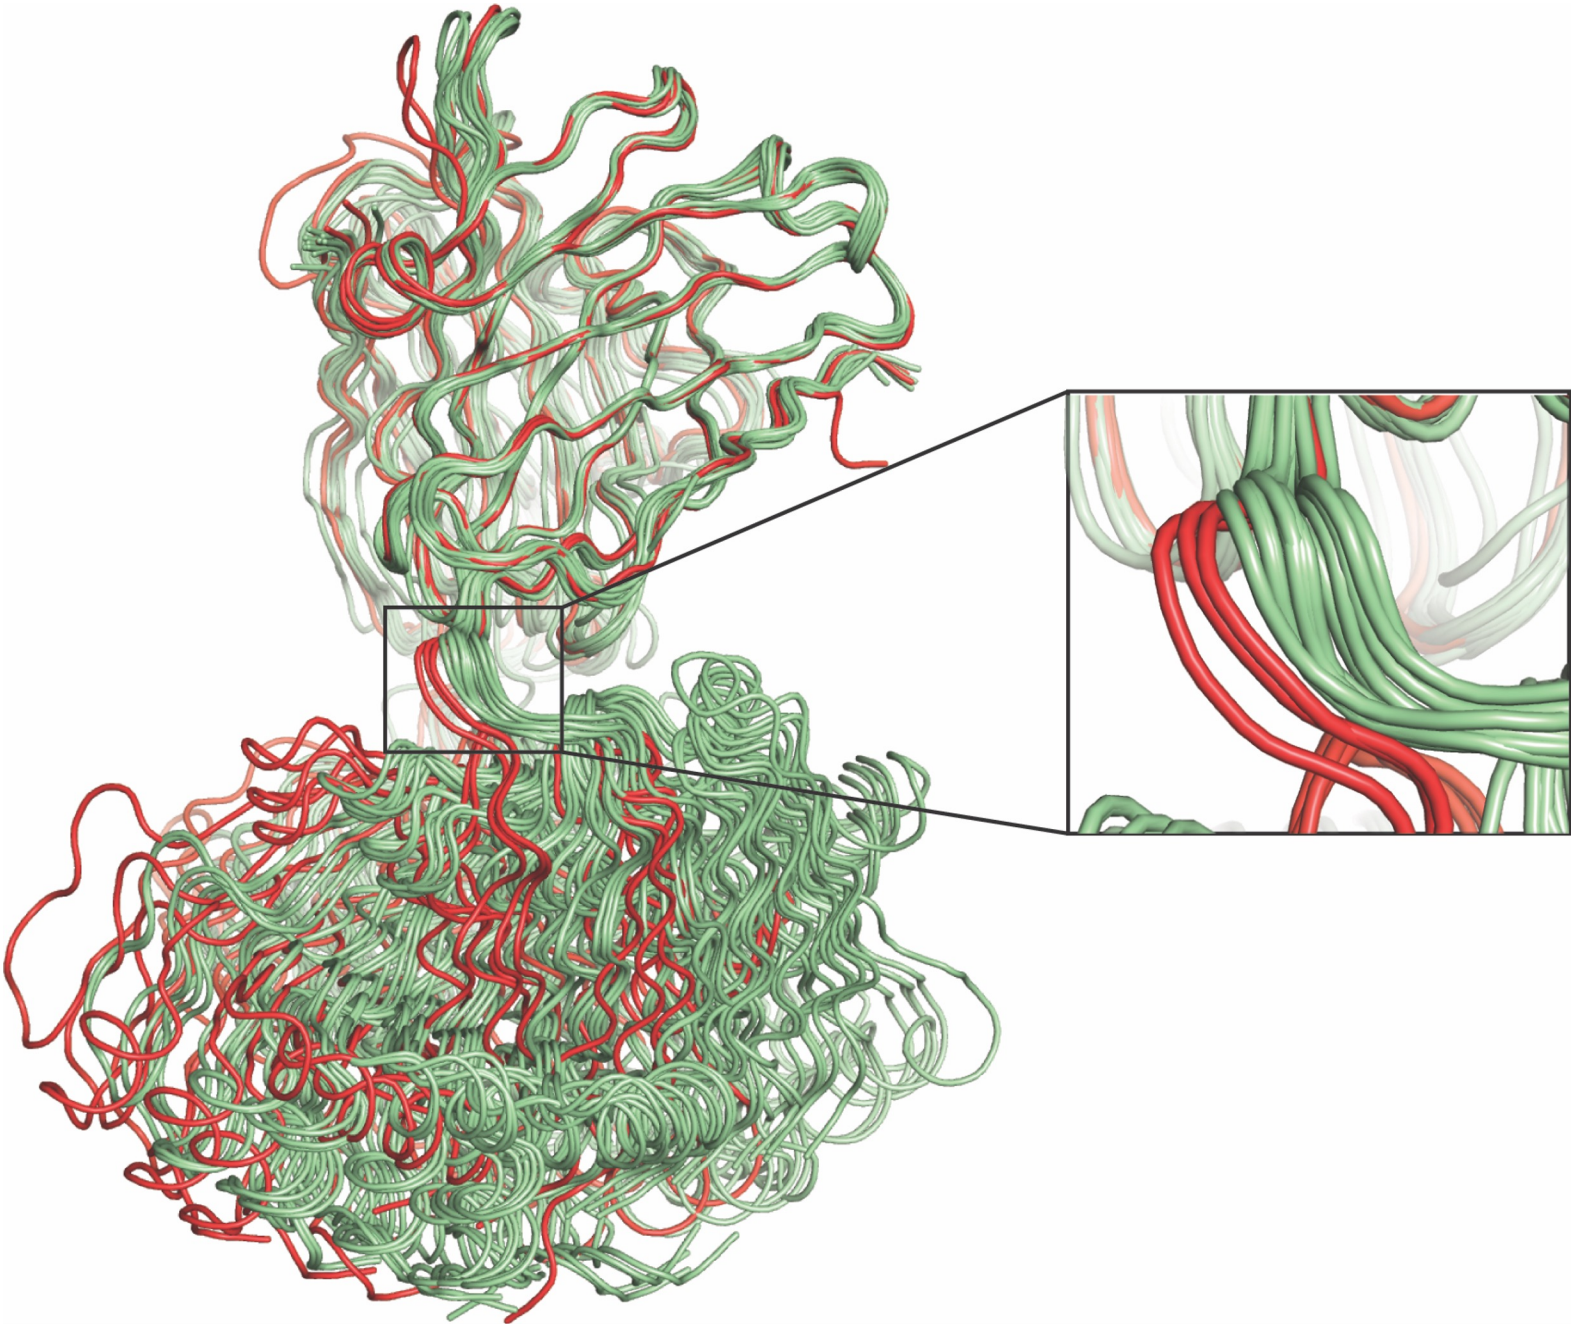

Fig. S11.

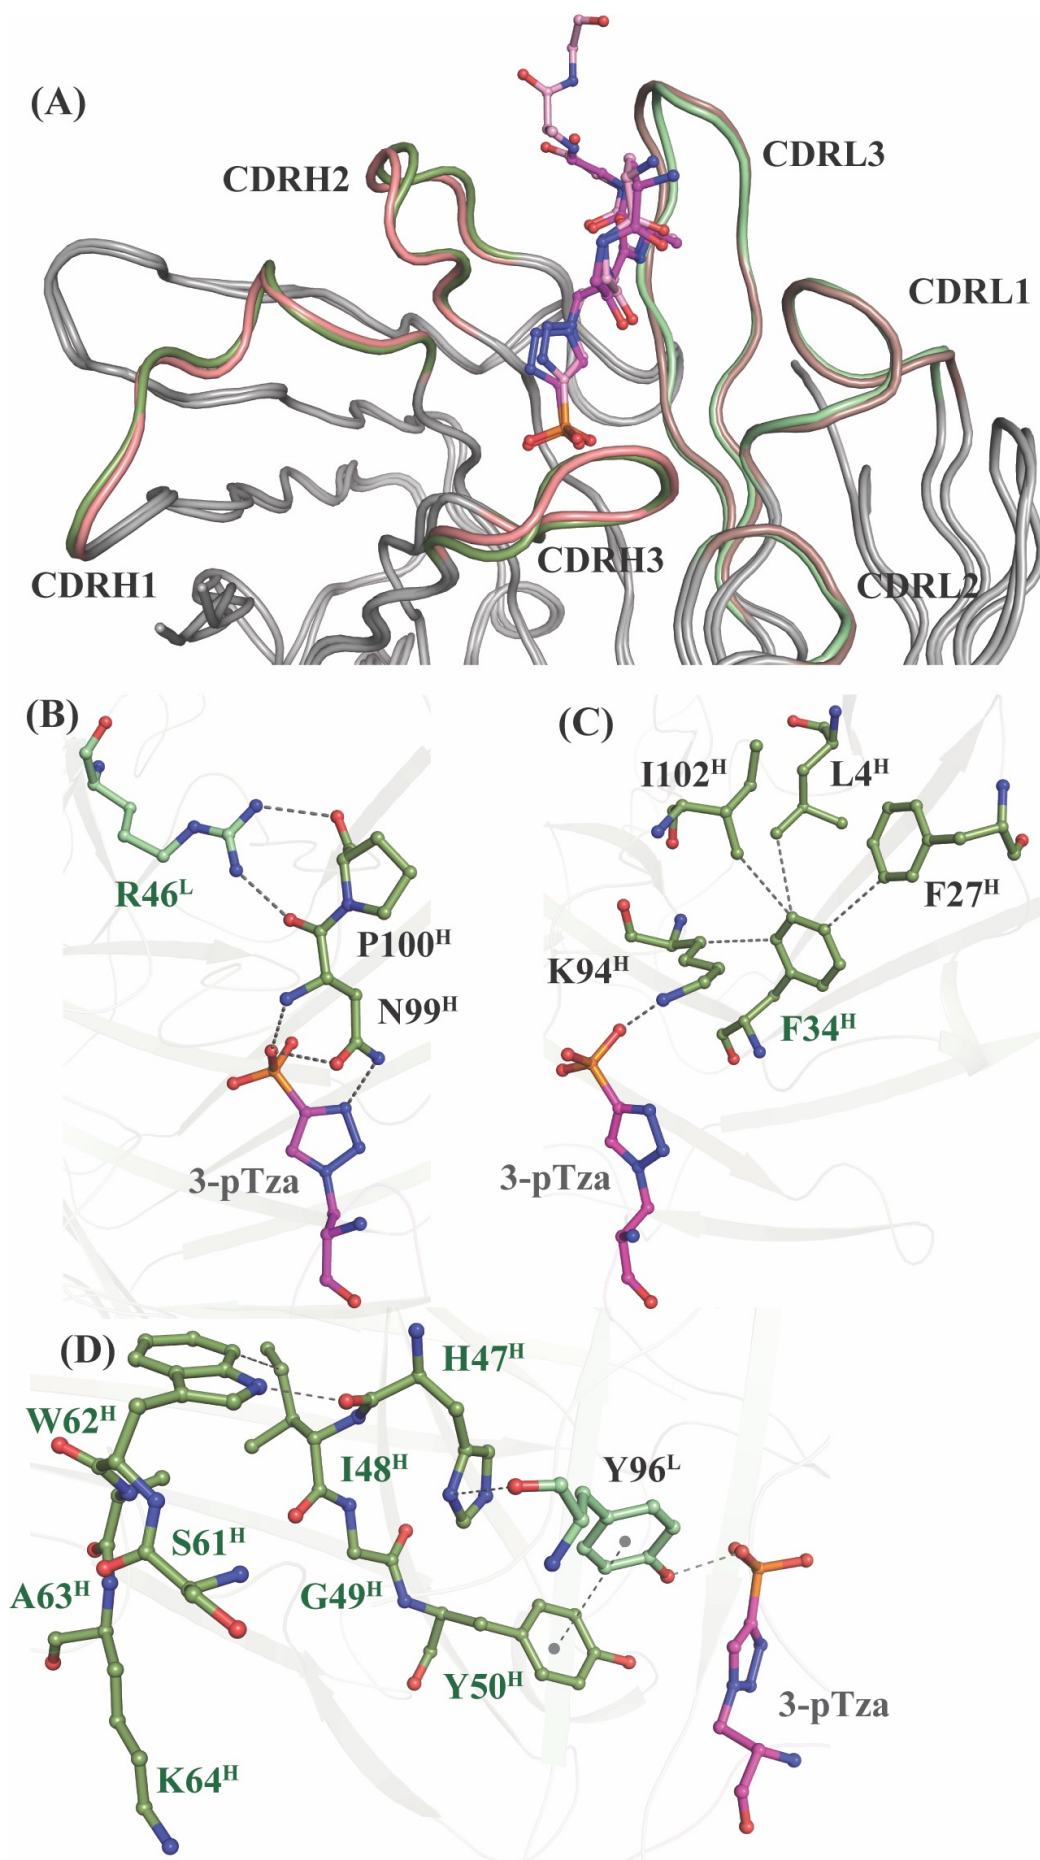

**Fig. S12.**

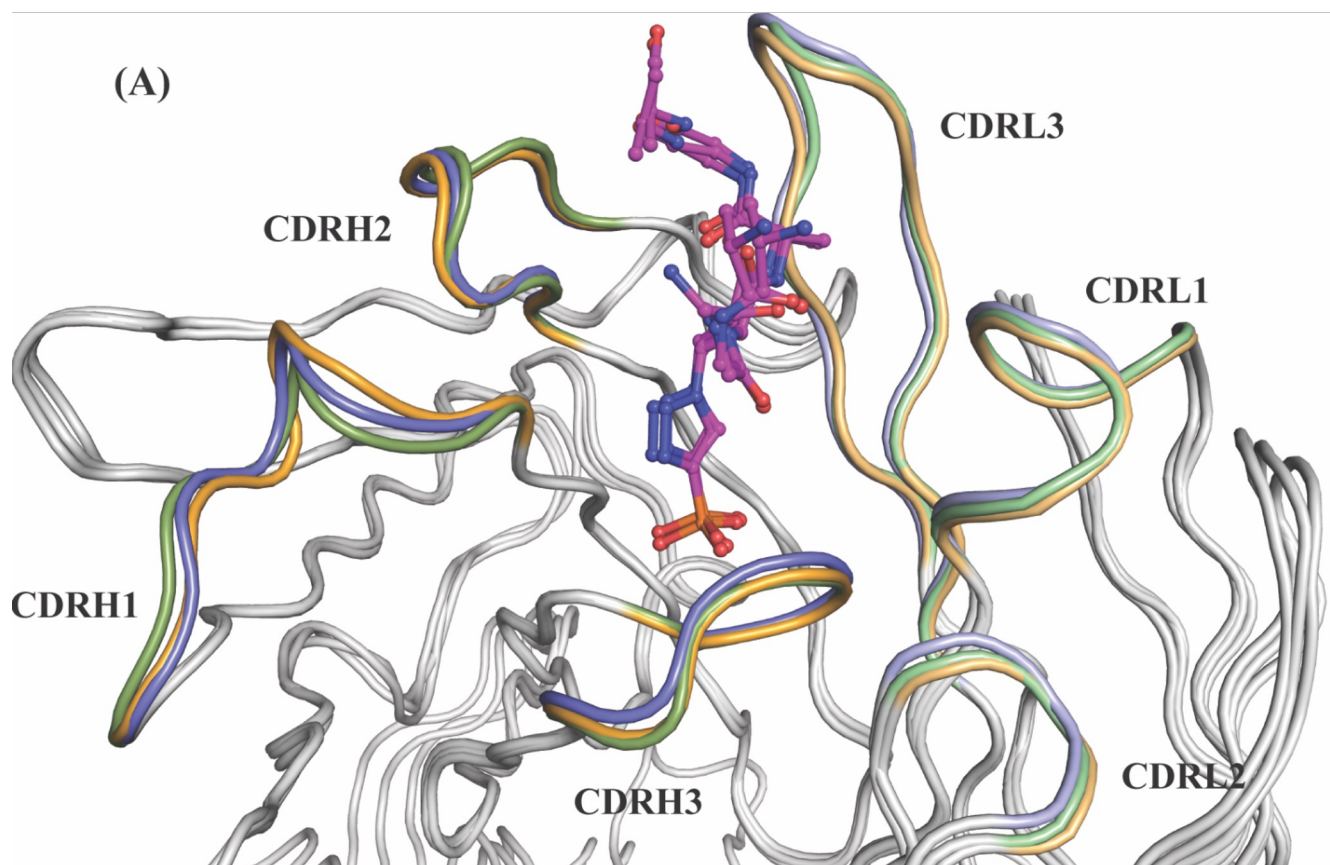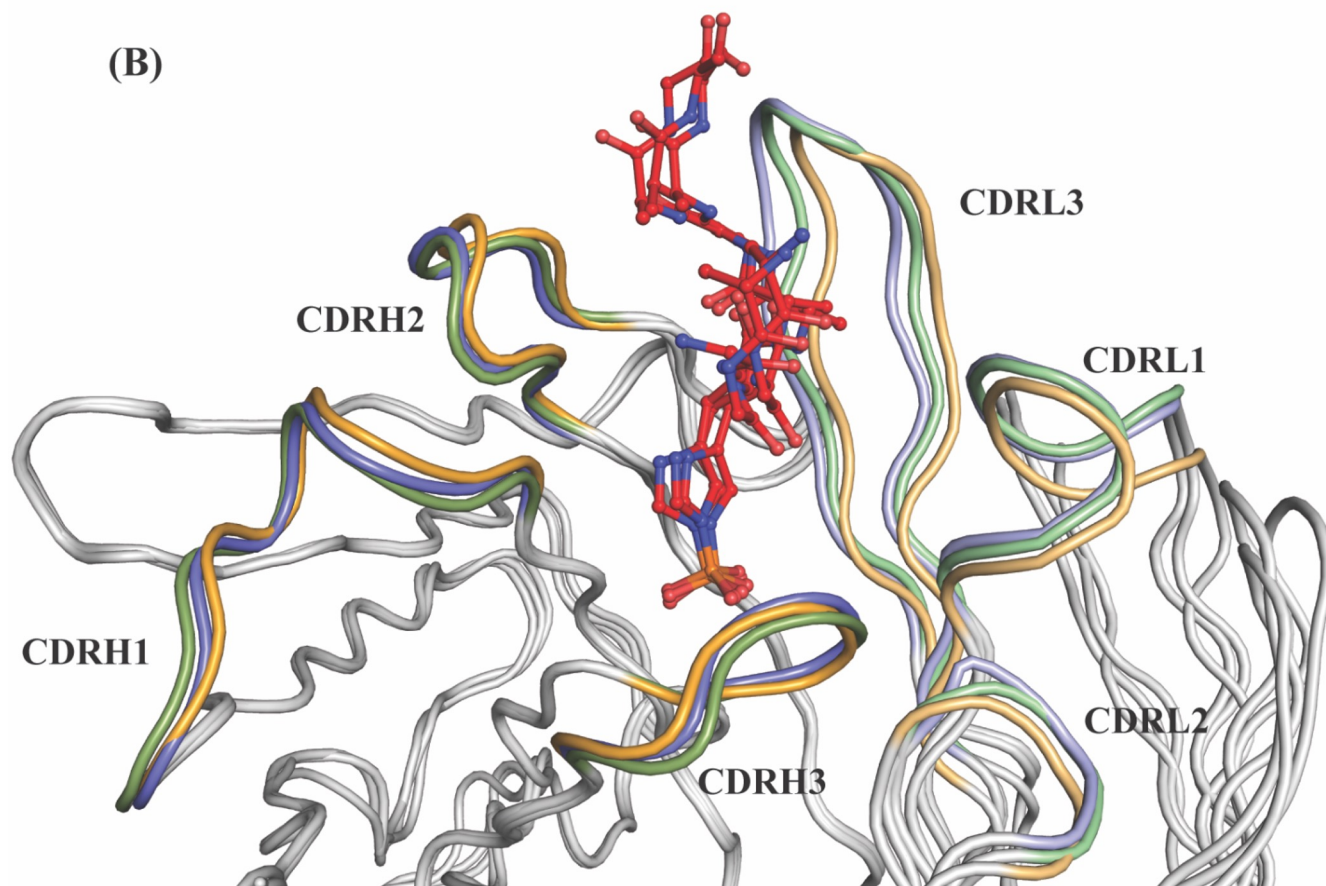

Fig. S13.

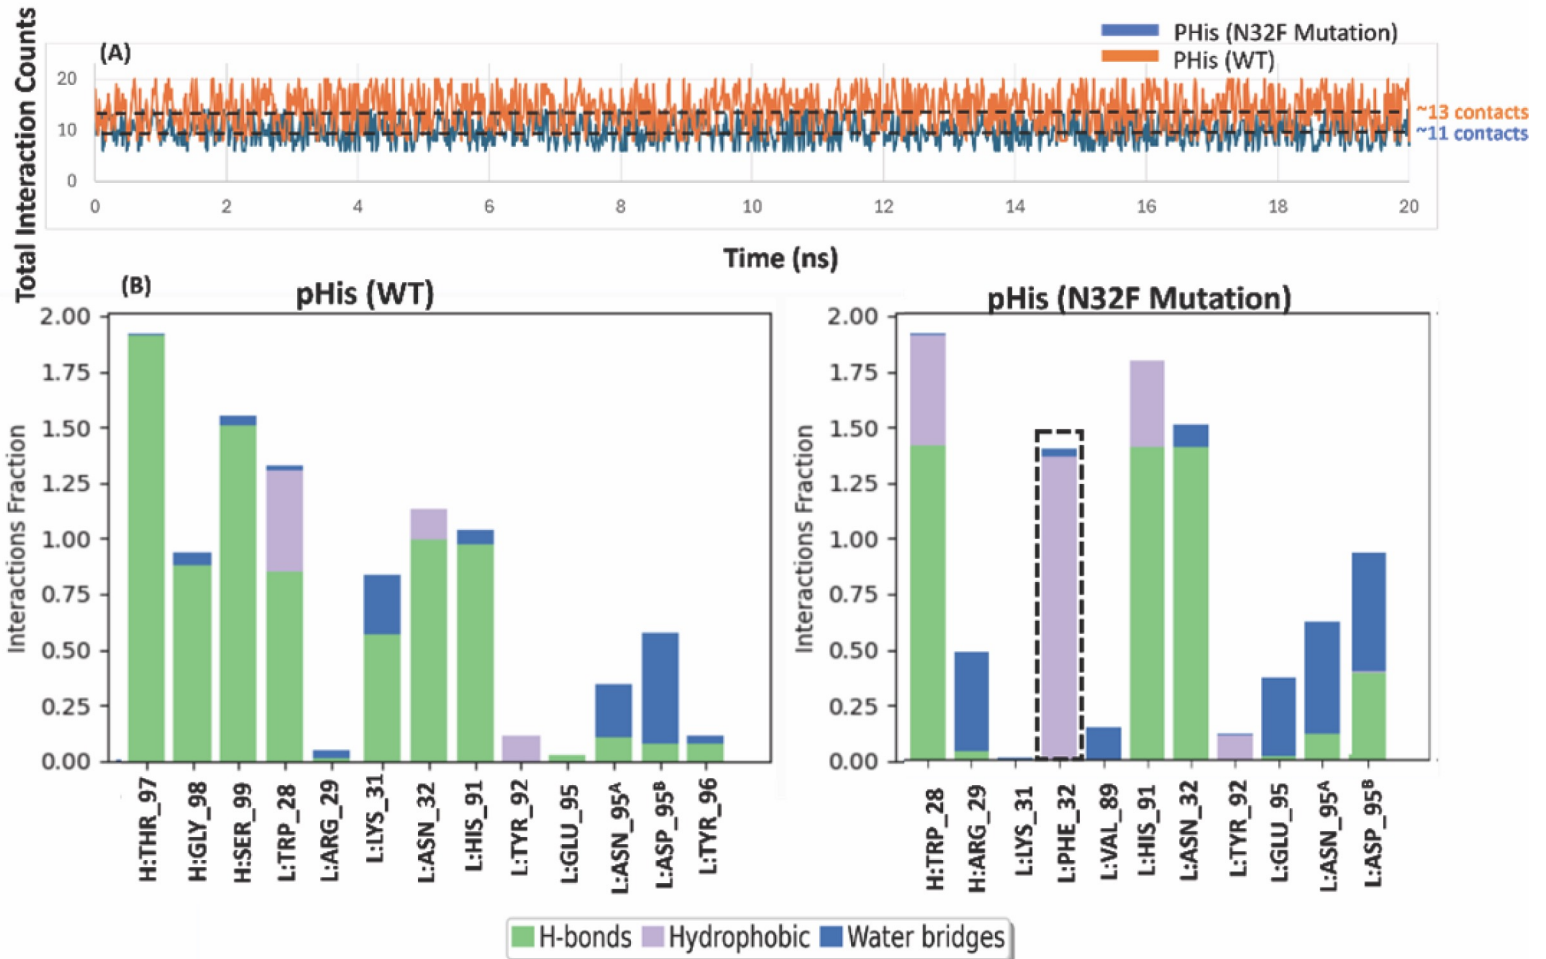

Fig. S14.

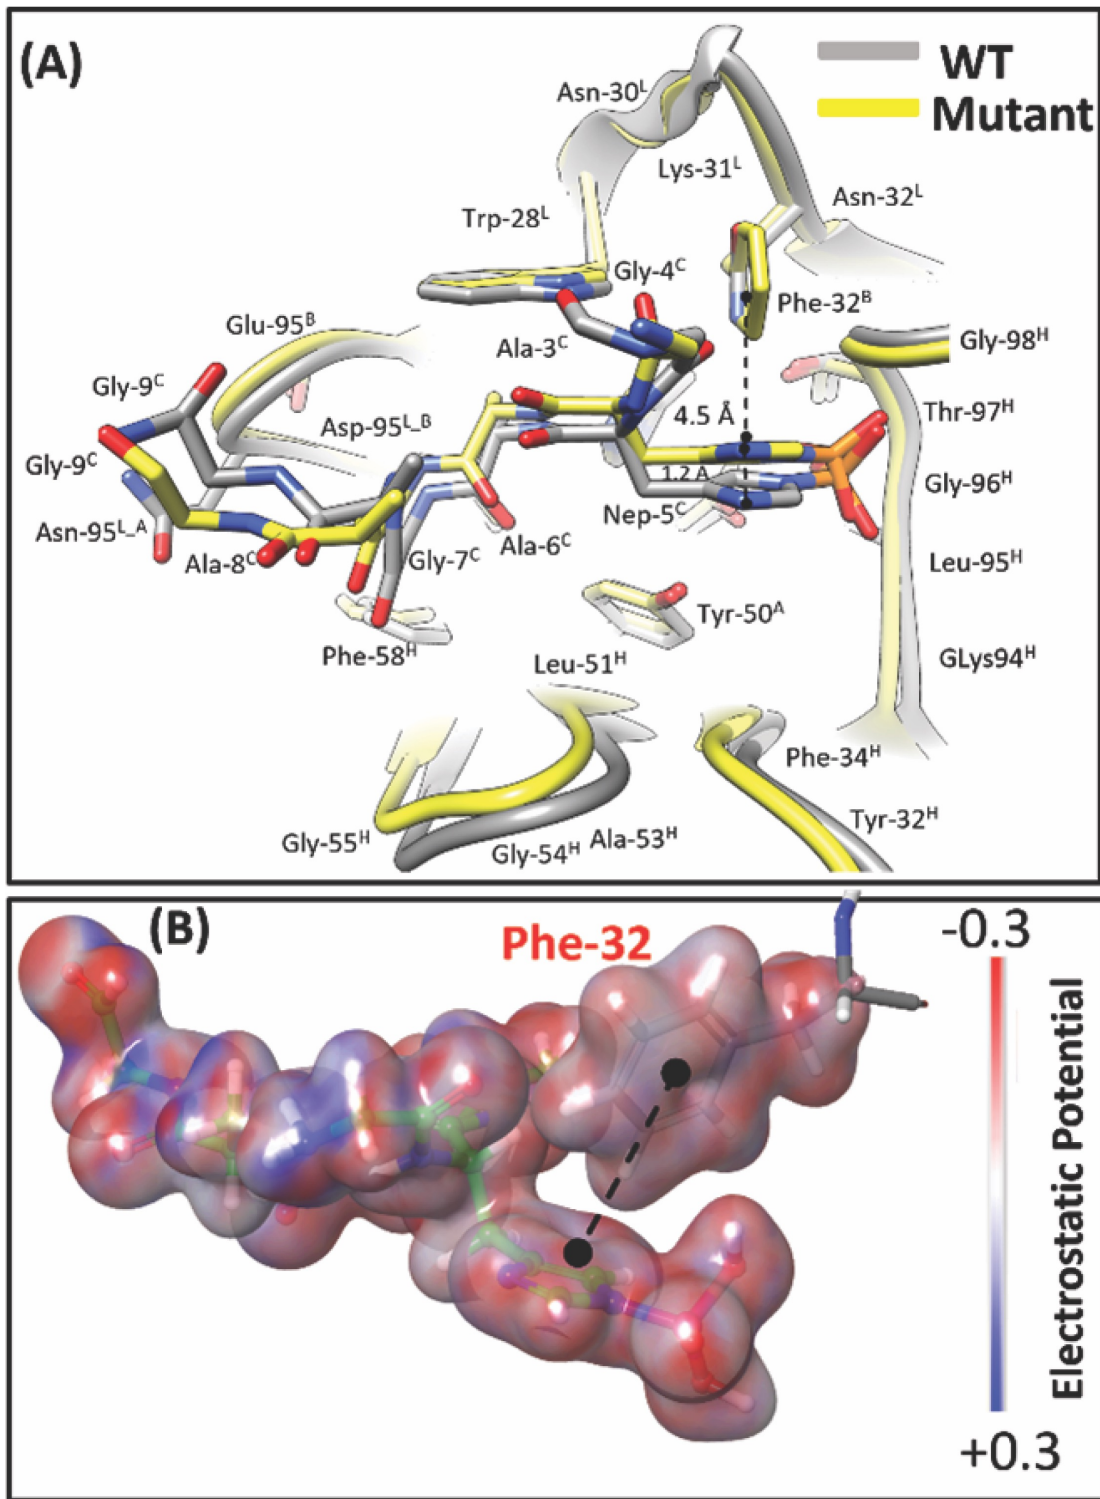

Fig. S15.

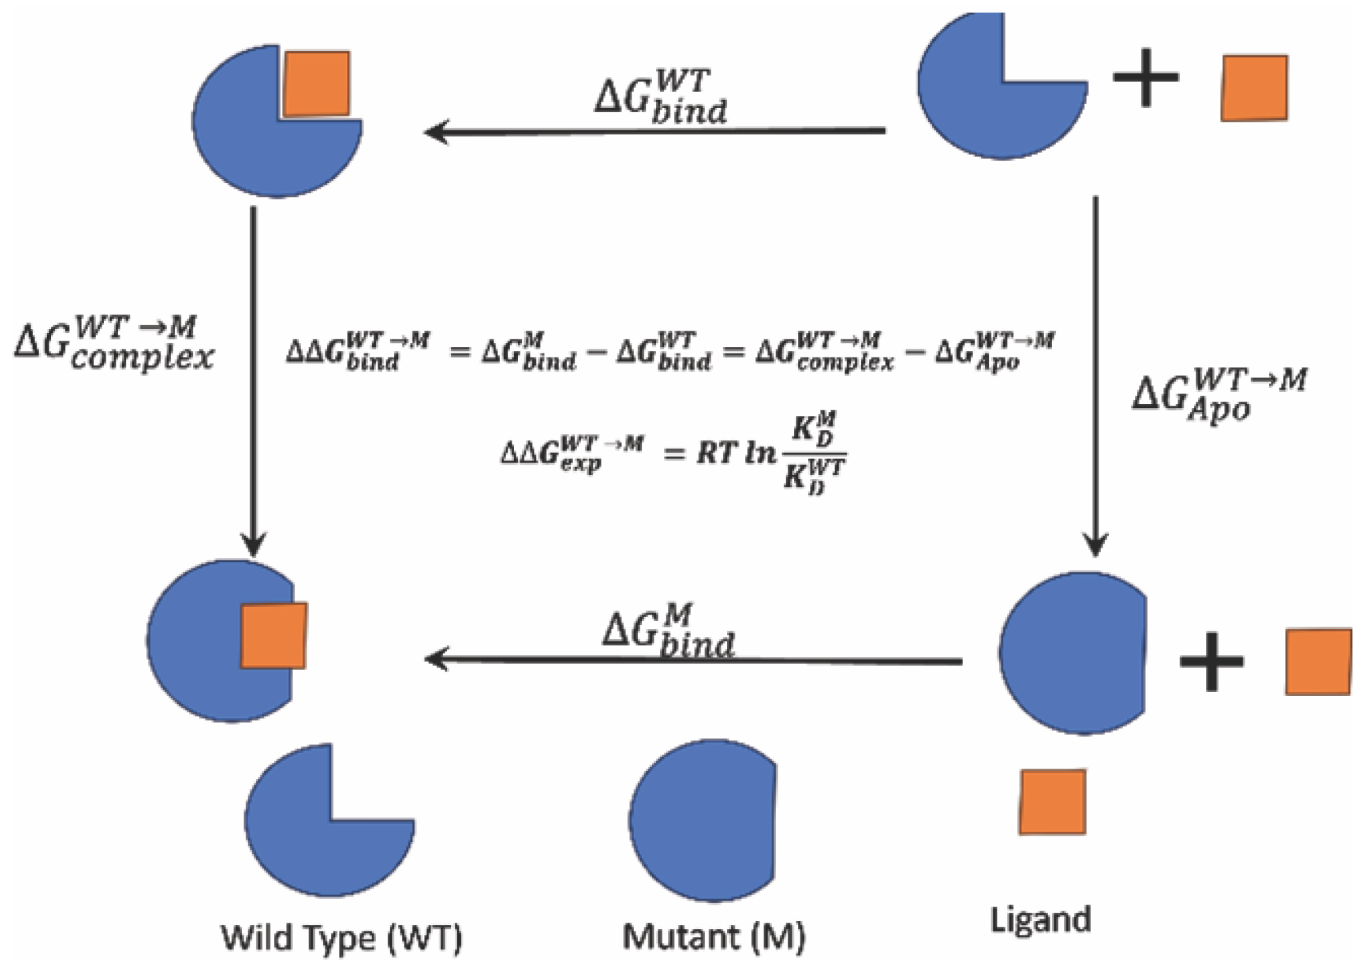

**Fig. S16.**

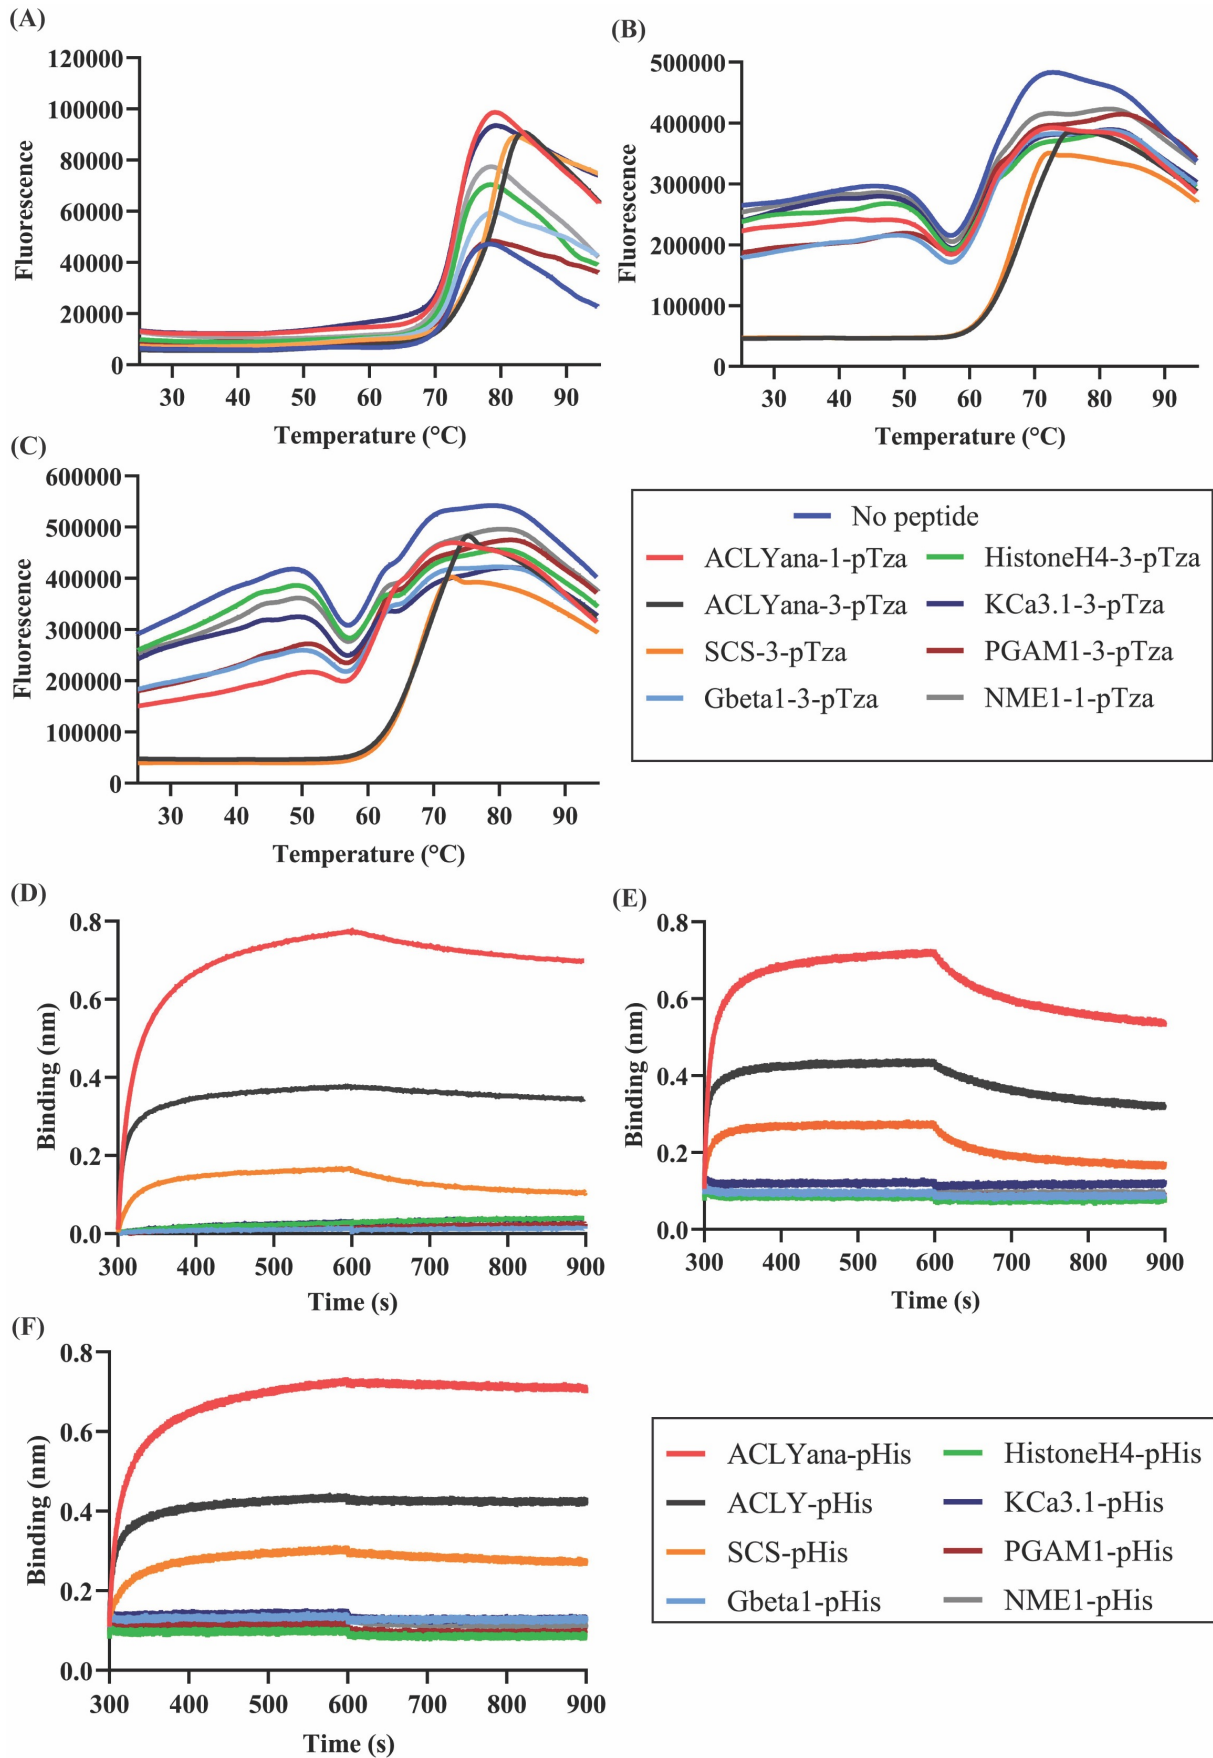



**Fig. S17.**

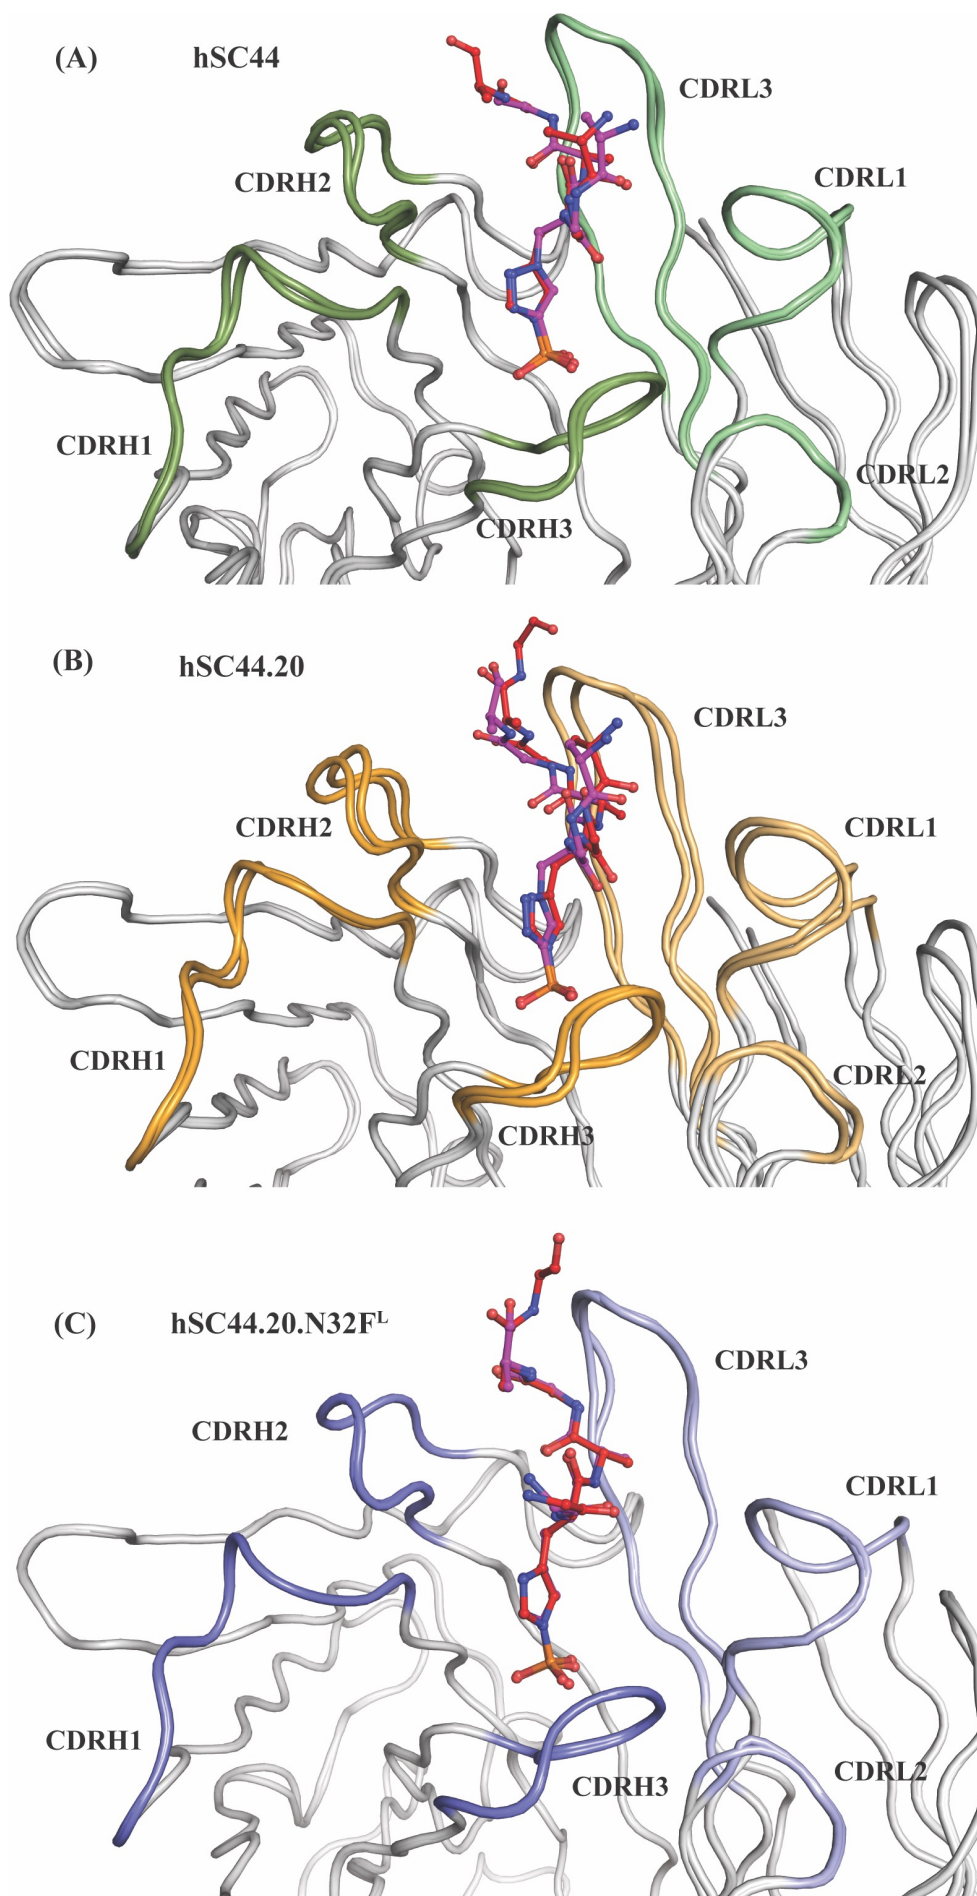

**Fig. S18.**

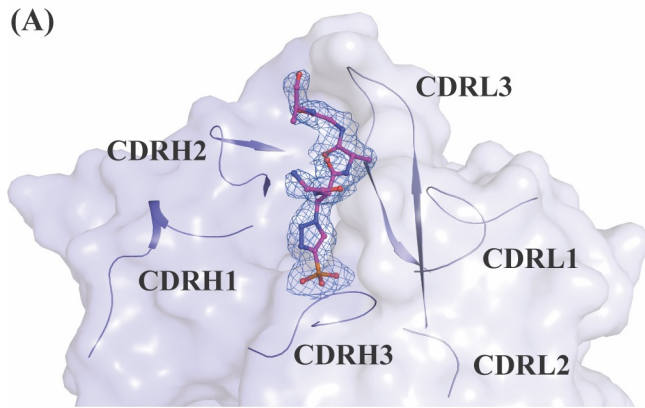

1 2 3 4 5 6 7 8 9  
Ala-Gly-Ala-Gly-3pTza-Ala-Gly-Ala-Gly

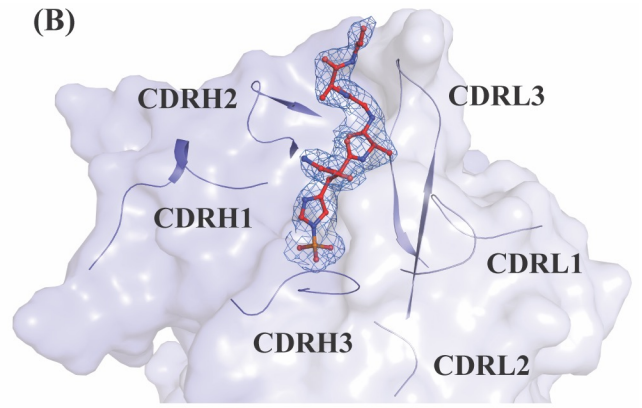

1 2 3 4 5 6 7 8 9  
Ala-Gly-Ala-Gly-3pHis-Ala-Gly-Ala-Gly

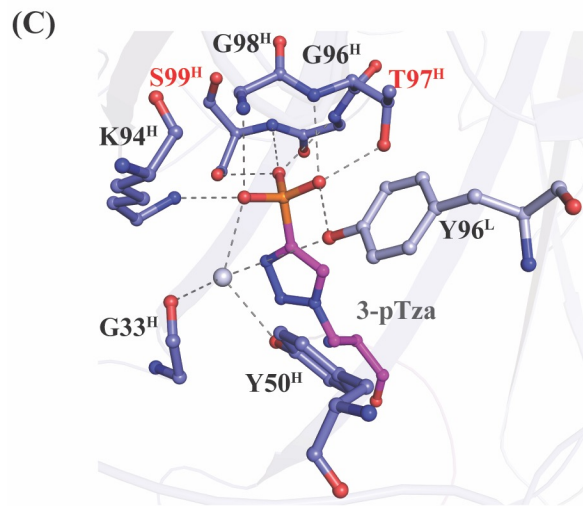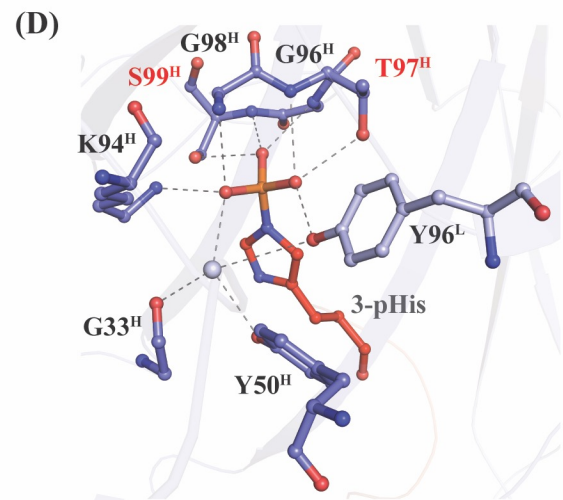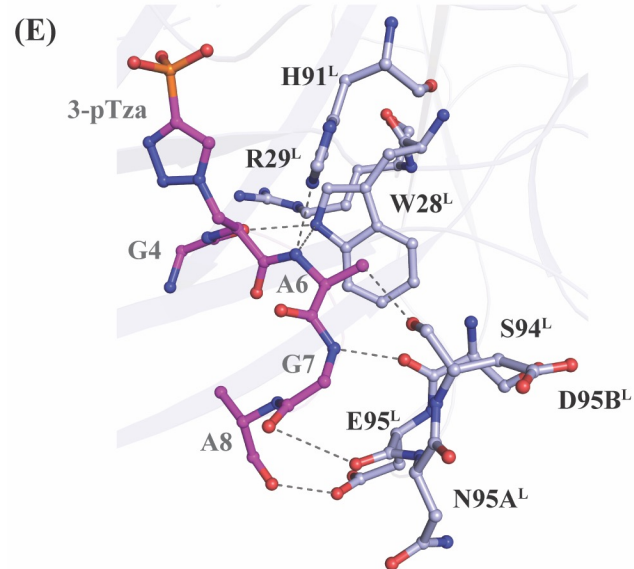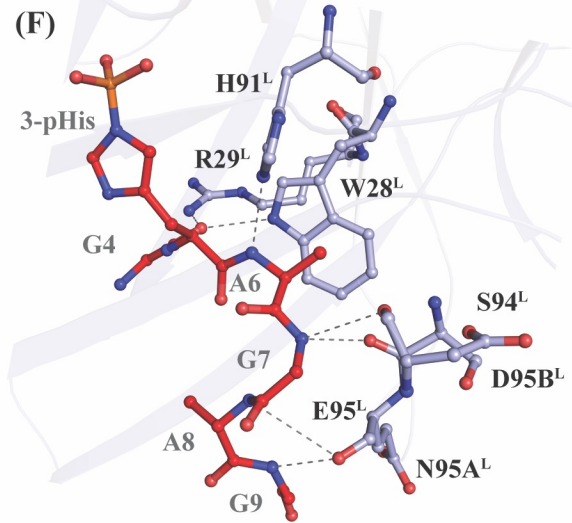

**Fig. S19.**

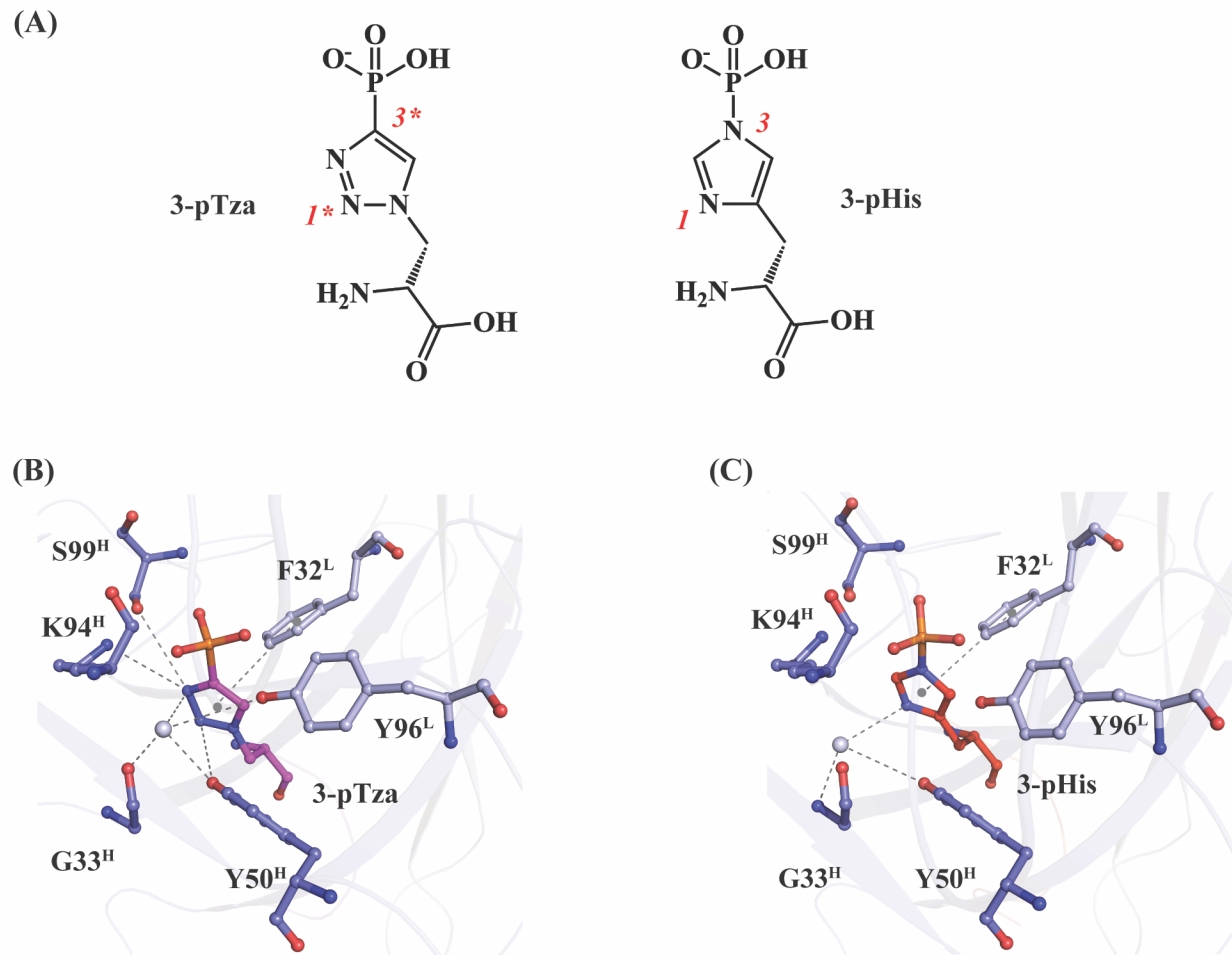

**Fig. S20.**

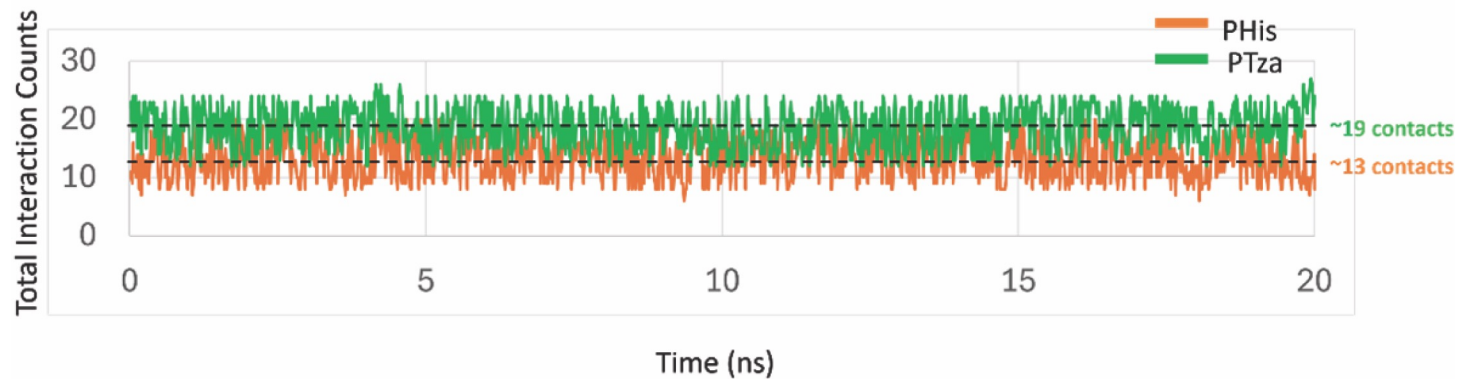

Fig. S21

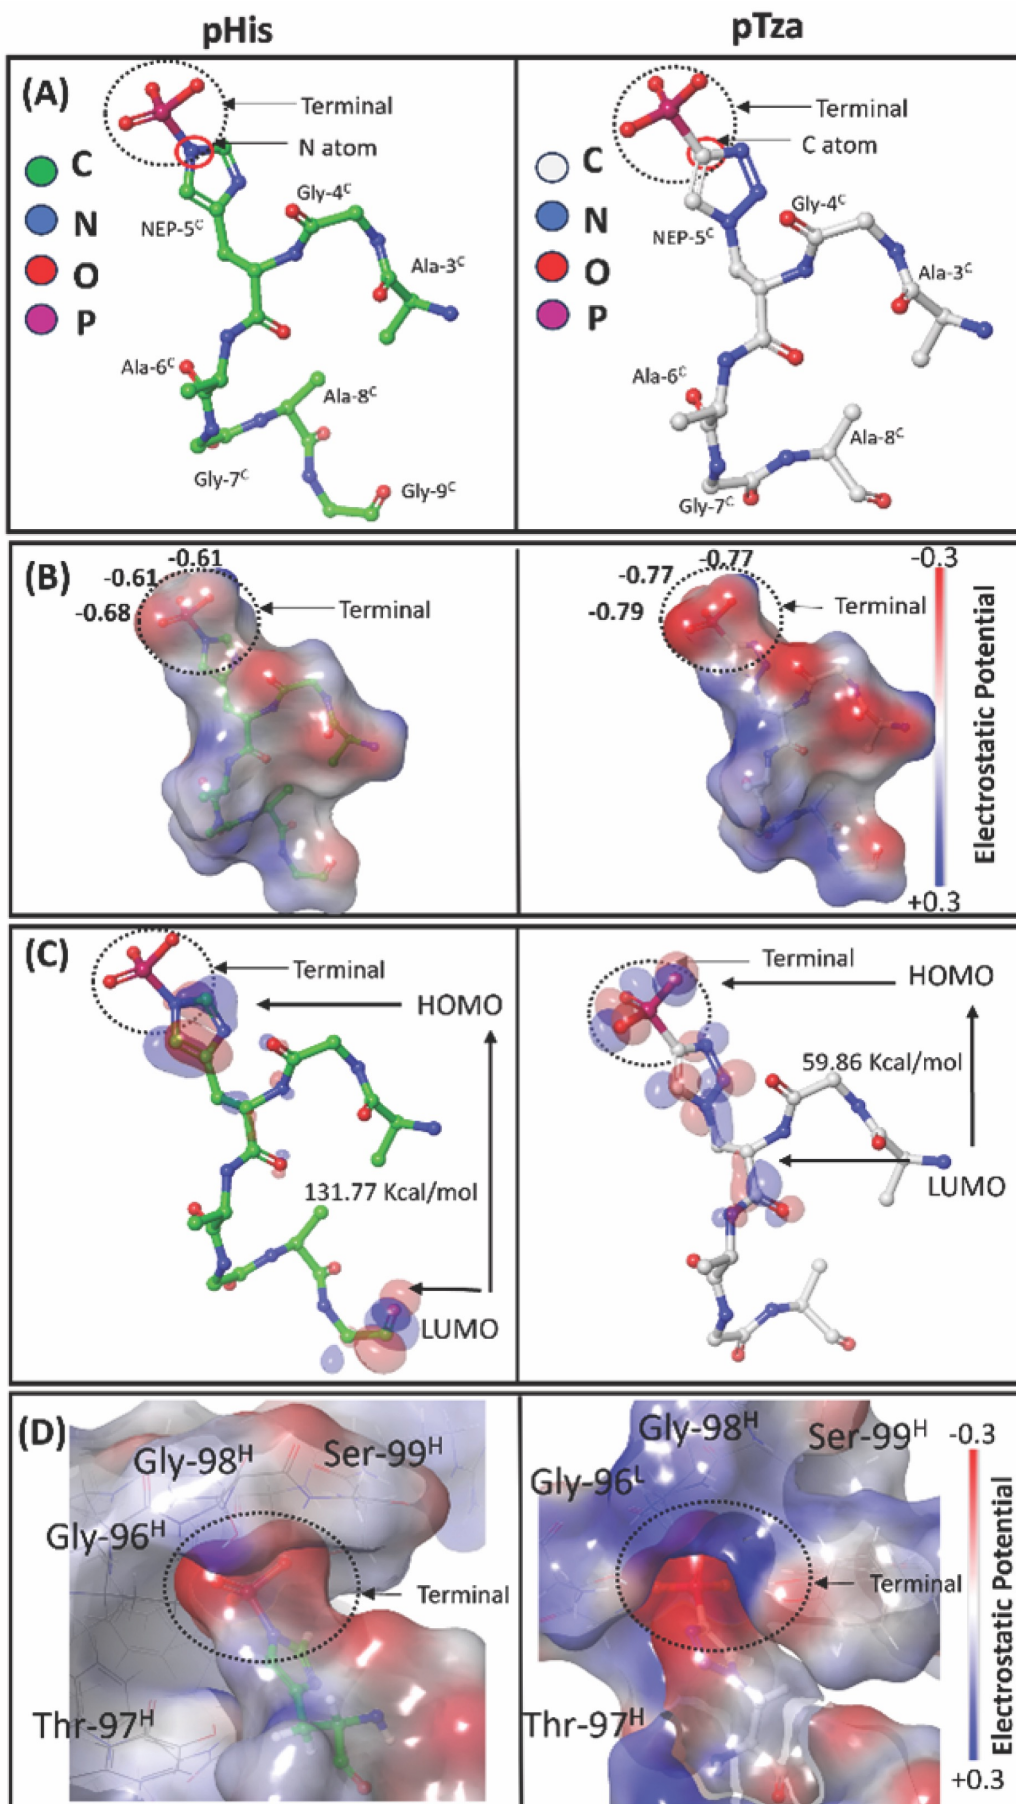

Fig. S22.

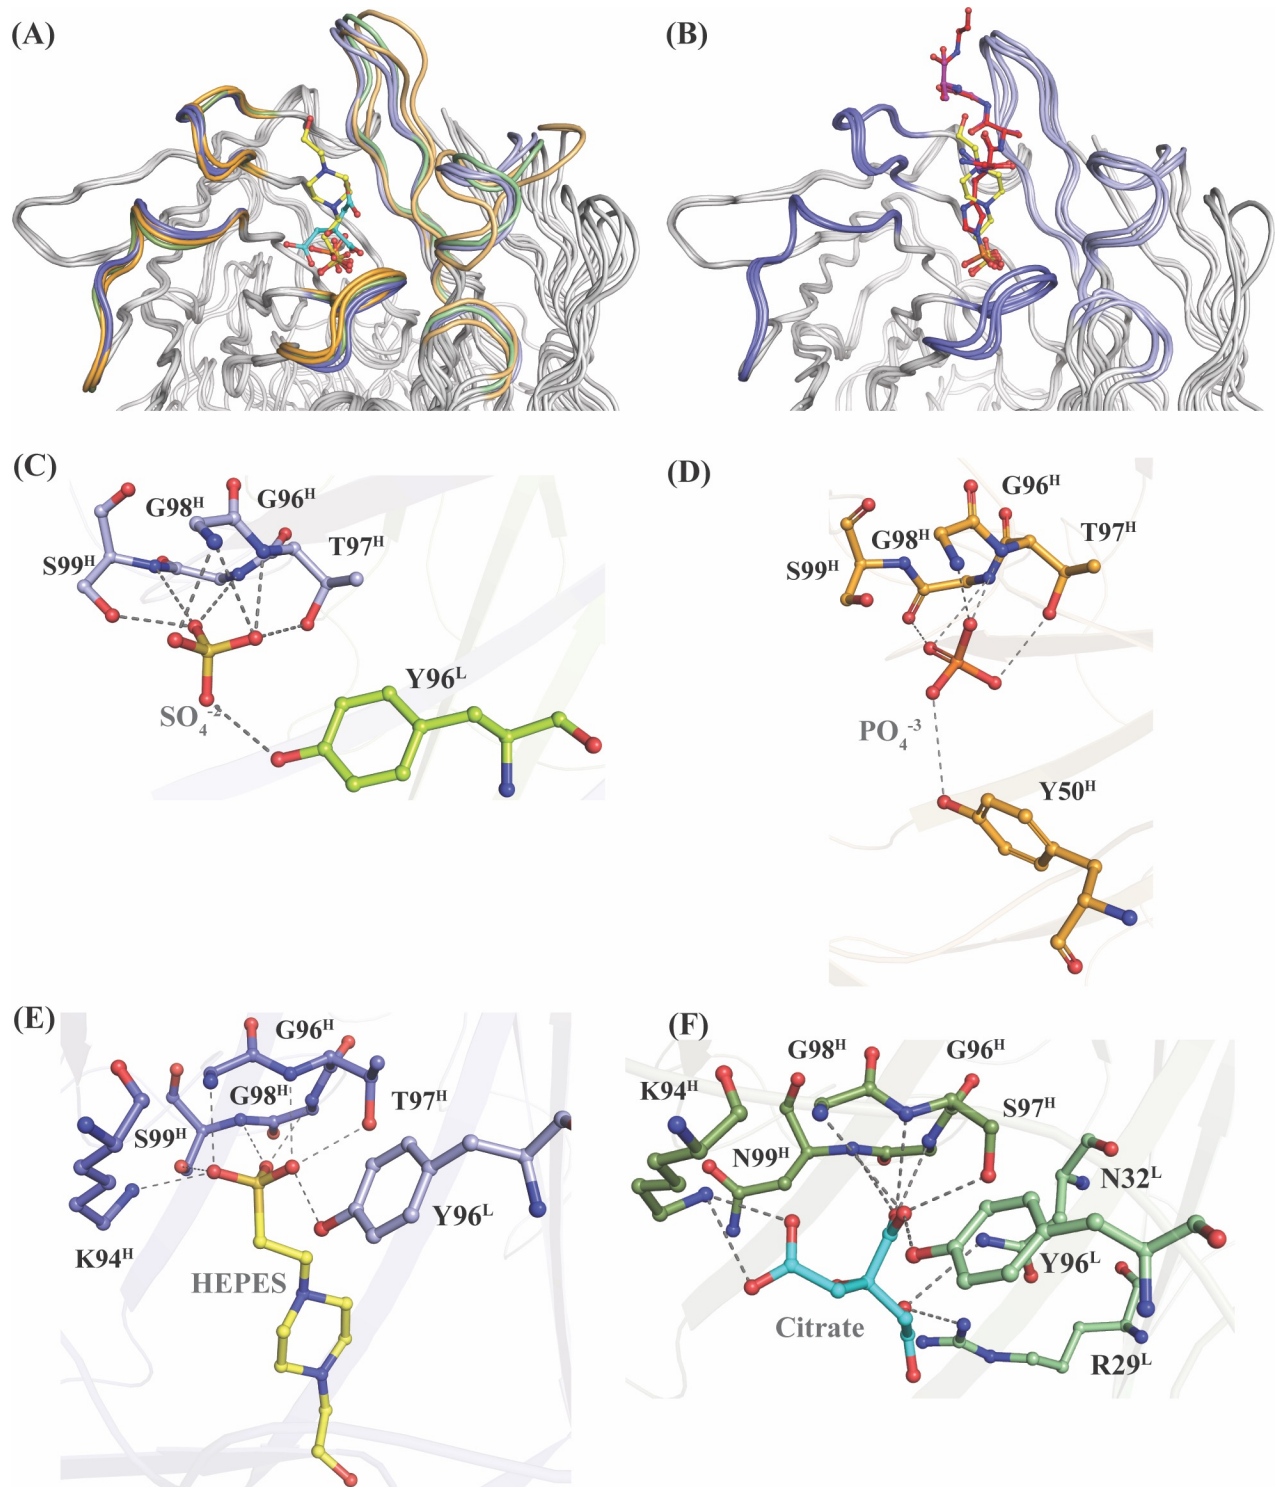

**Fig. S23.**

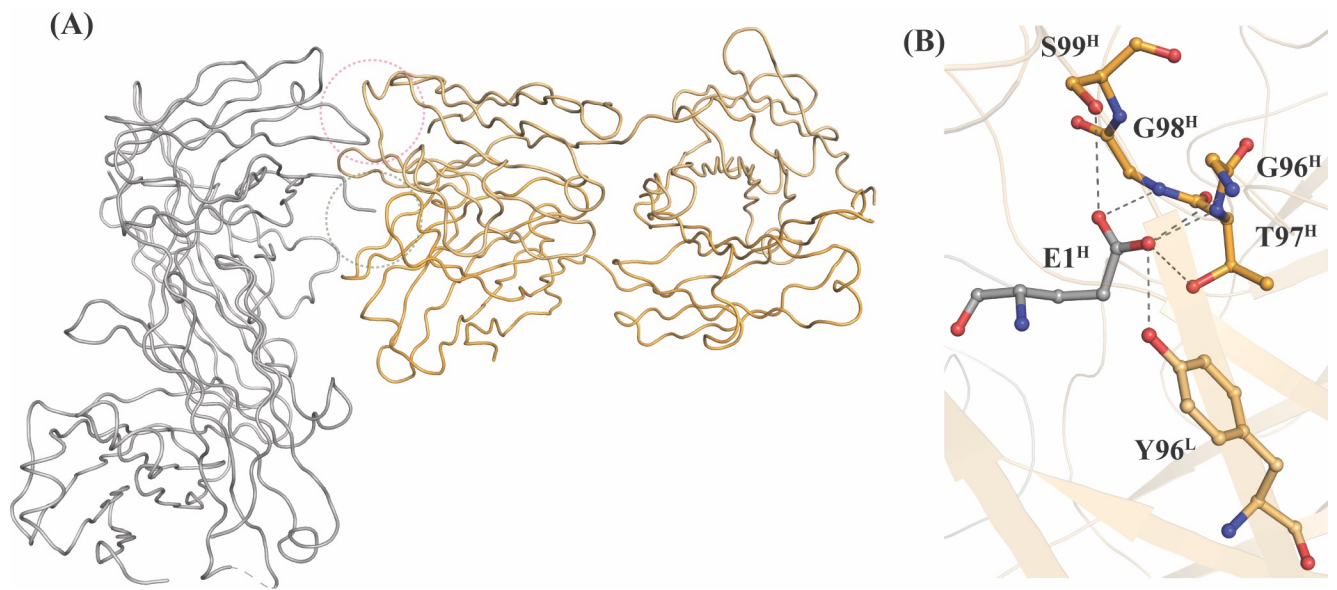

# Table S1.

**Table S1.** Mutagenic oligonucleotides used to generate libraries hSC44 1-6.

| Name       | Mutagenic Oligonucleotide Sequence                                                                                                                                   |
|------------|----------------------------------------------------------------------------------------------------------------------------------------------------------------------|
| hSC44.L1.1 | CGTGCCAGTCAGTCCGTG(N4:10101070)(N3:10107010)(N3)(N2:10701010)(N3)(N4)AAC(N1:70101010)(N1)(N1)(N1)(N2)GTAGCCTGGTATCAACAG                                              |
| hSC44.L1.2 | CGTGCCAGTCAGTCCGTG(N4:10101070)(N3:10107010)(N3)CGTAACAAG(N1:70101010)(N1)(N2:10701010)GTAGCCTGGTATCAACAG                                                            |
| hSC44.L3.1 | TACTGTGTGGGC(N2:10701010)(N1:70101010)(N4:10101070)TATGGCAGCGAAAACGATGCGTAT(N4)(N1)(N2)GCGTTCGGACAGGGTACC                                                            |
| hSC44.L3.2 | TACTGTGTGGGC(N2:10701010)(N1:70101010)(N4:10101070)TAT(N3:10107010)(N3)(N2)(N1)(N3)(N2)(N3)(N1)(N1)(N1)(N2)(N3)(N1)(N4)(N3)(N2)(N3)TAT(N4)(N1)(N2)GCGTTCGGACAGGGTACC |
| hSC44.H1.1 | GGCTTCAGCATTGATAGC(N4:10101070)(N1:70101010)(N4)(N3:10107010)(N3)(N2:10701010)TTAGCTGGTGCGTCAGGCC                                                                    |
| hSC44.H2.1 | CTGGAACATATTGGC(N4:10101070)(N1:70101010)(N4)CTG(N1)(N2:10701010)(N2)(N3:10107010)(N2)(N2)GGCGCCGTGCGTTTTATGCC                                                       |
| hSC44.H2.2 | CTGGAACATATTGGCTATCTG(N1:70101010)(N2:10701010)(N2)GCGGGCGGC(N2)(N3:10107010)(N4:10101070)GCGTTTTATGCCAGCTGG                                                         |
| hSC44.H3.1 | GTCTATTATTGTGCT(N1:70101010)(N1)(N1)(N2:10701010)(N4:10101070)(N4)(N3:10107010)(N3)(N2)(N1)(N3)(N2)(N3)(N2)(N1)(N1)(N2)(N2)(N2)(N3)(N4)(N4)GCGATTTGGGGTCAAGGAAC      |
| hSC44.H3.2 | GTCTATTATTGTGCT(N1:70101010)(N1)(N3:10107010)(N2:10701010)(N4:10101070)(N4)(N3)(N3)(N2)(N1)(N3)(N2)GGC(N1)(N1)(N2)CCG(N3)(N4)(N4)GCGATTTGGGGTCAAGGAAC                |
| hSC44.V.1  | AGCATTGATAGCTATGGC(N4:10101070)(N4)(N4)(N1:70101010)(N3:10107010)(N2:10701010)TGGGTGCGTCAGGCCCG                                                                      |
| hSC44.V.2  | GGTAAGGGCCTGGAA(N2:10701010)(N1:70101010)(N4:10101070)(N1)(N4)(N4)GGC(N4)(N1)(N4)CTGACCGCGGGC                                                                        |
| hSC44.V.3  | GGCGTGCG(N4:10101070)(N4)(N4)TATGCC(N1:70101010)(N3:10107010)(N2:10701010)(N4)(N3)(N3)(N3)(N2)(N2)AAG(N1)(N3)(N2)CGT(N1)(N3)(N2)ACTATAACC(N2)(N3)(N4)AACACAAAC       |
| hSC44.V.4  | GAAACACA(N3:10107010)(N4:10101070)(N4)ACCCTAAAAATGAACAGC                                                                                                             |



**Table S2.****Table S2.** Final concentrations of reagents used on various days of affinity selections.

|                                                        | Day 1   | Day 2   | Day 3   | Day 4   | Day 5   |
|--------------------------------------------------------|---------|---------|---------|---------|---------|
| BSA <sup>†</sup>                                       | 1%      | 1%      | 1%      | 1%      | 1%      |
| Streptavidin <sup>†</sup>                              | 10µg/mL | -       | 10µg/mL | -       | 10µg/mL |
| Neutravidin <sup>†</sup>                               | -       | 10µg/mL | -       | 10µg/mL | -       |
| No PO <sub>4</sub> <sup>-</sup> Peptide <sup>*,†</sup> | -       | 10nM    | 25nM    | 50nM    | 100nM   |
| 1-pTza Peptide <sup>*,†</sup>                          | -       | 1nM     | 5nM     | 10nM    | 20nM    |
| 3-pTza/pHis Peptide <sup>*,†</sup>                     | 100nM   | 100nM   | 50nM    | 25nM    | 10nM    |
| No. Wells                                              | 24      | 12      | 8       | 6       | 4       |
| No. Washes                                             | 4       | 6       | 8       | 10      | 12      |

<sup>†</sup>Negative selections, ‡Positive Selections

\*Captured using 2µg/mL streptavidin/neutravidin on alternating days

**Table S3.****Table S3.** Elbow angles of variants of hSC44 Fabs

| <b>Fab</b>                      | <b>Ligand</b>          | <b>Protomers</b> | <b>Elbow angle (°)</b> |
|---------------------------------|------------------------|------------------|------------------------|
| hSC44.S1C                       | ACLYana-3-pTza peptide | HL               | 138.9                  |
|                                 |                        | AB               | 157.3                  |
| hSC44.S1C                       | ACLYana-3-pHis peptide | HL               | 137.8                  |
|                                 |                        | AB               | 157.1                  |
| hSC44.S1C                       | -                      | HL               | 138.9                  |
|                                 |                        | AB               | 159.7                  |
| hSC44.S1C.20                    | ACLYana-3-pTza peptide | HL               | 135.9                  |
| hSC44.S1C.20                    | ACLYana-3-pHis peptide | HL               | 135.8                  |
| hSC44.S1CE.20                   | -                      | HL               | 165.3                  |
| hSC44.S1CE.20                   | -                      | HL               | 172.6                  |
| hSC44.S1C.20.N32F <sup>L</sup>  | ACLYana-3-pTza peptide | HL               | 165.1                  |
|                                 |                        | AB               | 147.9                  |
| hSC44.S1C.20.N32F <sup>L</sup>  | ACLYana-3-pHis peptide | HL               | 165.4                  |
|                                 |                        | AB               | 149.0                  |
| hSC44.S1C.20.N32F <sup>L</sup>  | -                      | HL               | 156.2                  |
| hSC44.S1CE.20.N32F <sup>L</sup> | -                      | HL               | 156.1                  |

# Table S4.

## Table S4. Data collection and refinement statistics for newly solved Fab-Antigen crystal structures.

Table S4. X-ray data collection and refinement statistics for newly solved Fab-Antigen structures.

| Structure Name                                                | hSC44.S1C            | hSC44.S1C            | hSC44.S1C            | hSC44.S1C.20        | hSC44.S1C.20        | hSC44.S1C.20                     | hSC44.S1C.20      | hSC44.S1C.20.N32F <sup>1</sup> | hSC44.S1C.20.N32F <sup>1</sup> | hSC44.S1C.20.N32F <sup>2</sup> | hSC44.S1C.20.N32F <sup>2</sup> |
|---------------------------------------------------------------|----------------------|----------------------|----------------------|---------------------|---------------------|----------------------------------|-------------------|--------------------------------|--------------------------------|--------------------------------|--------------------------------|
|                                                               | AGAG-3pTza-AGAG      | AGAG-3pHis-AGAG      | No peptide (citrate) | AGAG-3pTza-AGAG     | AGAG-3pHis-AGAG     | No peptide (GluH1 <sup>†</sup> ) | No peptide (PO4)  | AGAG-3pTza-AGAG                | AGAG-3pHis-AGAG                | No peptide (SO4)               | No peptide (HEPES)             |
| <b>Data collection</b>                                        |                      |                      |                      |                     |                     |                                  |                   |                                |                                |                                |                                |
| Beamline                                                      | SSRL 12-1            | SSRL 12-1            | APS 23-ID-B          | APS 23-ID-D         | SSRL 12-1           | ALS 5.0.1                        | ALS 5.0.1         | ALS 5.0.1                      | ALS 5.0.1                      | ALS 5.0.1                      | ALS 5.0.1                      |
| Wavelength (Å)                                                | 0.97946              | 0.97946              | 1.03317              | 1.0332              | 0.97946             | 0.97741                          | 0.97741           | 0.97741                        | 0.97741                        | 0.97741                        | 0.97741                        |
| Resolution (Å) <sup>a</sup>                                   | 39.34-1.95           | 38.72-2.20           | 46.91-1.75           | 41.04-1.85          | 34.82-1.90          | 47.17-2.45                       | 49.79-2.40        | 47.25-1.98                     | 47.19-2.09                     | 48.05-1.94                     | 46.27-1.84                     |
| Resolution group                                              | P2,2,2               | P2,2,2               | P2,2,2               | C2                  | P2 <sub>1</sub>     | P2,2,2                           | P4,2,2            | P2,2,2                         | P2,2,2                         | P2,2,2                         | P2,2,2                         |
| Unit cell (Å)                                                 | 92.50, 139.62, 73.62 | 93.25, 139.06, 73.71 | 93.82, 138.85, 73.21 | 79.96, 73.12, 88.07 | 44.11, 72.61, 70.33 | 49.7, 73.3, 148.5                | 72.3, 72.3, 205.9 | 71.55, 73.95, 239.65           | 71.28, 74.03, 239.28           | 69.47, 73.25, 96.11            | 48.57, 72.07, 152.2            |
| (°)                                                           | 90, 90, 90           | 90, 90, 90           | 90, 90, 90           | 90, 111.24, 90      | 90, 98.21, 90       | 90, 90, 90                       | 90, 90, 90        | 90, 90, 90                     | 90, 90, 90                     | 90, 90, 90                     | 90, 90, 90                     |
| Total reflections                                             | 733,426              | 637,037              | 688,286              | 155,586             | 148,666             | 127,101                          | 219,439           | 538,821                        | 418,880                        | 284,579                        | 293,288                        |
| Unique reflections                                            | 68,051(3151)         | 46,924(2432)         | 95,210(4089)         | 40,163(1984)        | 33,299(1333)        | 19,822(839)                      | 22,383(1088)      | 89,758(4417)                   | 71,747(3417)                   | 36,687(1806)                   | 46,607(2191)                   |
| Multiplicity                                                  | 10.8(7.8)            | 12.9(9.4)            | 7.2(5.5)             | 3.9(3.3)            | 4.5(3.6)            | 6.4(5.7)                         | 9.8(6.2)          | 6.0(5.6)                       | 5.8(5.2)                       | 7.8(7.6)                       | 6.3(4.5)                       |
| Completeness (%)                                              | 97.5(91.3)           | 99.9(99.9)           | 98.1(85.3)           | 99.8(99.4)          | 96.1(77.1)          | 96.3(84.2)                       | 100(99.7)         | 100(100)                       | 95.2(92.7)                     | 100(100)                       | 99.2(94.4)                     |
| Mean I/σ <sub>I</sub>                                         | 13.1(1.7)            | 11.8(1.8)            | 10.0(1.6)            | 6.9(1.1)            | 9.9(2.8)            | 19.1(2.1)                        | 28.0(2.7)         | 6.9(1.5)                       | 13.9(1.5)                      | 11.4(1.0)                      | 16.0(1.2)                      |
| R <sub>merge</sub> <sup>b</sup> (%)                           | 14.3(193)            | 22.1(483)            | 12.4(117)            | 13.1(128)           | 16.2(120)           | 6.3(85.4)                        | 7.1(76.1)         | 12.5(135)                      | 10.1(130)                      | 18.0(238)                      | 10.0(178)                      |
| R <sub>meas</sub> <sup>c</sup> (%)                            | 14.9(205)            | 23.0(512)            | 13.3(129)            | 15.1(151)           | 18.3(141)           | 6.9(94.1)                        | 7.5(83.0)         | 13.7(150)                      | 11.0(144)                      | 19.3(254)                      | 10.8(200)                      |
| R <sub>rim</sub> <sup>d</sup> (%)                             | 4.4(67.3)            | 6.4(166)             | 4.9(52.9)            | 7.4(79.2)           | 8.2(71.9)           | 2.7(38.7)                        | 2.3(32.2)         | 5.6(63.6)                      | 4.4(61.1)                      | 6.7(88.4)                      | 4.2(90.4)                      |
| CC <sub>1/2</sub> <sup>e</sup> (%)                            | 99.8(47.2)           | 99.8(56.5)           | 99.7(41.1)           | 99.5(44.1)          | 99.2(55.0)          | 99.9(70.6)                       | 99.9(80.2)        | 99.5(39.6)                     | 99.7(43.2)                     | 99.3(37.4)                     | 99.6(37.1)                     |
| <b>Refinement</b>                                             |                      |                      |                      |                     |                     |                                  |                   |                                |                                |                                |                                |
| Refinement resolution (Å) <sup>a</sup>                        | 39.34-1.95           | 38.72-2.20           | 46.91-1.75           | 41.04-1.85          | 34.82-1.90          | 47.17-2.45                       | 49.79-2.40        | 47.25-1.98                     | 47.2-2.09                      | 48.05-1.94                     | 46.27-1.84                     |
| # reflections in refinement (work/free)                       | 64,623/3393          | 46,924/2489          | 90,339/4802          | 38,147/1978         | 31,562/1721         | 18,793/985                       | 21,221/1079       | 85,368/4291                    | 68,152/3509                    | 34,775/1846                    | 44,224/2299                    |
| R <sub>work</sub> <sup>b</sup> (%)                            | 21.2/26.0            | 23.0/27.5            | 21.0/23.9            | 20.5/24.3           | 17.2/21.3           | 24.4/29.0                        | 25.8/29.3         | 22.4/25.7                      | 21.8/24.5                      | 21.8/24.7                      | 20.4/23.6                      |
| # atoms (Fab/Peptide/Solvent)                                 | 6556/64/223          | 6556/69/64           | 6532/na/476          | 6514/57/283         | 6526/69/188         | 3286/na/10                       | 3287/na/34        | 6589/64/206                    | 6552/72/334                    | 3278/na/149                    | 3336/na/480                    |
| RMS (bonds)                                                   | 0.006                | 0.002                | 0.006                | 0.003               | 0.005               | 0.005                            | 0.003             | 0.008                          | 0.002                          | 0.003                          | 0.005                          |
| RMS (angles)                                                  | 0.91                 | 0.6                  | 0.83                 | 0.75                | 0.77                | 0.71                             | 0.61              | 0.94                           | 0.52                           | 0.66                           | 0.86                           |
| Ramachandran favoured/allowed/ outliers (%)                   | 96.9/2.9/0.2         | 97.6/2.4/0           | 96.7/2.9/0.4         | 97.7/2.3/0          | 97.7/2.1/0.2        | 95.1/4.7/0.2                     | 96.0/4.0/0        | 96.4/3.6/0                     | 97.3/2.6/0.1                   | 97.7/2.3/0                     | 98.4/1.6/0                     |
| Ramachandran plot Z score                                     | 0.02                 | -0.1                 | 0.2                  | -0.1                | 0.8                 | -1.4                             | -1.6              | -0.29                          | -0.81                          | 0.06                           | 0.39                           |
| Clashscore <sup>f</sup>                                       | 3.1                  | 1.8                  | 3.7                  | 0.6                 | 1.5                 | 3.2                              | 4.6               | 2.1                            | 1.4                            | 2.6                            | 3.5                            |
| Wilson B (Å <sup>2</sup> )                                    | 30                   | 41                   | 22                   | 22                  | 21                  | 53                               | 51                | 32                             | 36                             | 27                             | 25                             |
| Average B (Å <sup>2</sup> ) for all atoms/Fab/Peptide/Solvent | 40/38/54/34          | 56/56/85/43          | 34/34/na/30          | 29/29/38/32         | 25/25/22/27         | 63/63/na/46                      | 72/72/na/51       | 42/42/56/36                    | 43/43/56/41                    | 30/30/46/29                    | 31/30/20/36                    |
| PDB ID                                                        | 8UJI                 | 8UIT                 | 8UIO                 | 8UIH                | 8UIG                | 8UHT                             | 8UHS              | 8UHP                           | 8UHN                           | 8UJH                           | 8UHH                           |

<sup>a</sup>Numbers in parentheses are for highest resolution shell

$$R_{merge} = \sum_{hkl} \sum_{i=1}^n |I(hkl)_i - \langle I(hkl) \rangle| / \sum_{hkl} \sum_{i=1}^n I(hkl)_i$$

$$R_{meas} = \sum_{hkl} \sqrt{(n-1)} \sum_{i=1}^n |I(hkl)_i - \langle I(hkl) \rangle| / \sum_{hkl} \sum_{i=1}^n I(hkl)_i$$

$$R_{rim} = \sum_{hkl} \sqrt{(1/n-1)} \sum_{i=1}^n |I(hkl)_i - \langle I(hkl) \rangle| / \sum_{hkl} \sum_{i=1}^n I(hkl)_i$$

<sup>c</sup>CC<sub>1/2</sub> = Pearson Correlation Coefficient between two random half datasets

<sup>d</sup>Number of unfavorable all-atom steric overlaps  $\geq 0.4\text{\AA}$  per 1000 atoms

**Table S5.****Table S5.** Constructs with ligand, crystallization conditions and cryoprotectant used for crystallization experiments

| <b>pHis Fab</b>                       | <b>Ligand</b>    | <b>Crystallization condition</b>                                                     | <b>Cryoprotectant</b> |
|---------------------------------------|------------------|--------------------------------------------------------------------------------------|-----------------------|
| hSC44.S1C (C1)                        | AGAG-3-pTza-AGAG | 0.2 M Lithium citrate, 20% PEG3350                                                   | 30 % Ethylene glycol  |
| hSC44.S1C (A7)                        | AGAG-3-pHis-AGAG | 0.2 M Calcium chloride, 20% PEG3350                                                  | 30 % Ethylene glycol  |
| hSC44.S1C (A2)                        | No ligand        | 0.2 M Lithium citrate, 20% PEG3350                                                   | 30 % Ethylene glycol  |
| hSC44.S1C.20 (J13)                    | AGAG-3-pTza-AGAG | 0.2 M tri-potassium citrate, 20% PEG3350                                             | 25% PEG400            |
| hSC44.S1C.20 (B5)                     | AGAG-3-pHis-AGAG | 0.2 M tri-potassium citrate, 20% PEG3350                                             | 25% PEG400            |
| hSC44.S1CE.20 (C16)                   | No ligand        | 0.1 M Tris pH 8.5, 8% PEG8000                                                        | 30 % Ethylene glycol  |
| hSC44.S1CE.20 (A10)                   | No ligand        | 0.1 M HEPES pH 7.5, 20% PEG4000, 10% 2-propanol                                      | 30 % Ethylene glycol  |
| hSC44.S1C.20.N32F <sup>L</sup> (E12)  | AGAG-3-pTza-AGAG | 0.08 M Sodium Cacodylate pH 6.5, 0.16 M Calcium acetate, 20% glycerol, 14.4% PEG8000 | 10% glycerol          |
| hSC44.S1C.20.N32F <sup>L</sup> (E14)  | AGAG-3-pHis-AGAG | 0.08 M Sodium Cacodylate pH 6.5, 0.16 M Calcium acetate, 20% glycerol, 14.4% PEG8000 | 10% glycerol          |
| hSC44.S1C.20.N32F <sup>L</sup> (C8)   | No ligand        | 0.1 M Tris pH 8.5, 0.2 M Lithium sulfate, 40% PEG400                                 | Well solution         |
| hSC44.S1CE.20.N32F <sup>L</sup> (C15) | No ligand        | 0.1 M HEPES pH 7.5, 20% PEG4000, 10% 2-propanol                                      | 30 % Ethylene glycol  |

**Table S6.**

**Table S6:** Changes in the ligand binding free energies caused by the N32F<sup>L</sup> mutation. The first column shows the binding free energy differences from FEP calculations ( $\Delta\Delta G_{bind}^{WT \rightarrow M}$ ) of 3-pHis, whereas the last column shows the experimentally obtained binding free energy differences.

| System                               | Relative Binding Free energy<br>$\Delta\Delta G_{bind}$ (Kcal/mol) | K <sub>D</sub> (M) | Experimental binding free energy $\Delta\Delta G_{bind}$ (Kcal/mol) |
|--------------------------------------|--------------------------------------------------------------------|--------------------|---------------------------------------------------------------------|
| pHis_SC44H.20.F (N32F <sup>L</sup> ) | -1.1±0.4                                                           | 1.68E-09           | $RT \ln \frac{K_D^M}{K_D^{WT}} = -1.4$                              |
| pHis_SC44H.20.F (WT)                 |                                                                    | 2.10E-08           |                                                                     |
